# Supplementary material
Source: publisher site journal article supplement (https://www.dovepress.com/article/344750)
Supplement: Supplementary file 1 [file get_supplementary_file.php]

## Supplementary materials

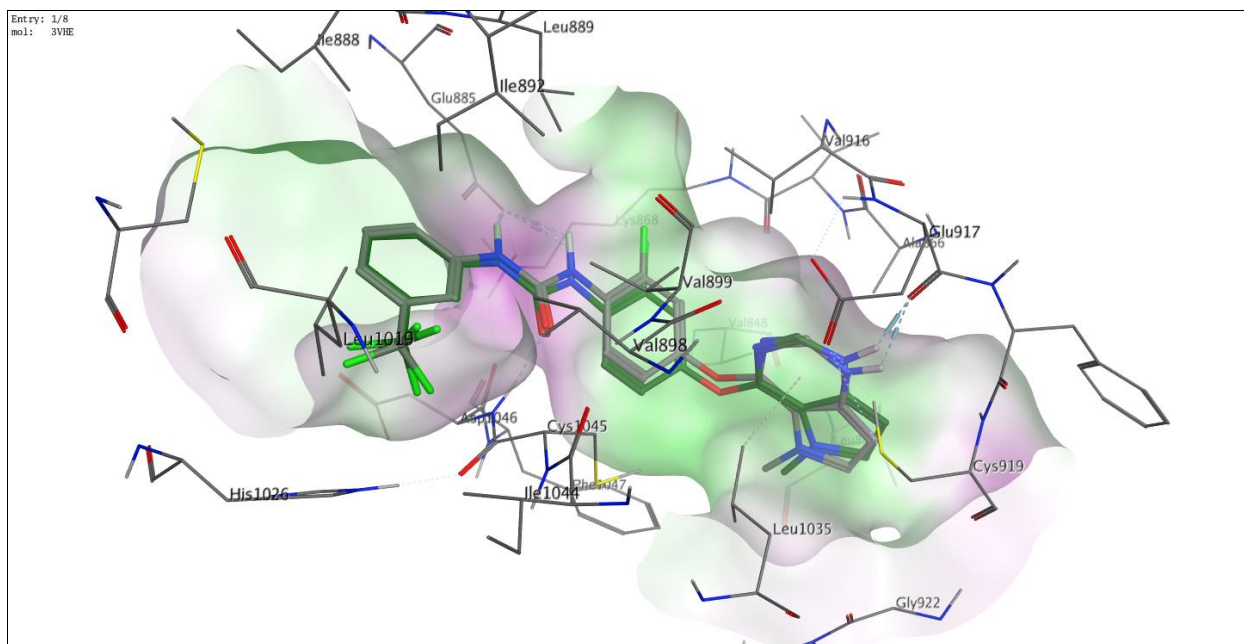

Figure S 1: Overlay of the redocked ligand (gray) and the co crystallized pose (green)

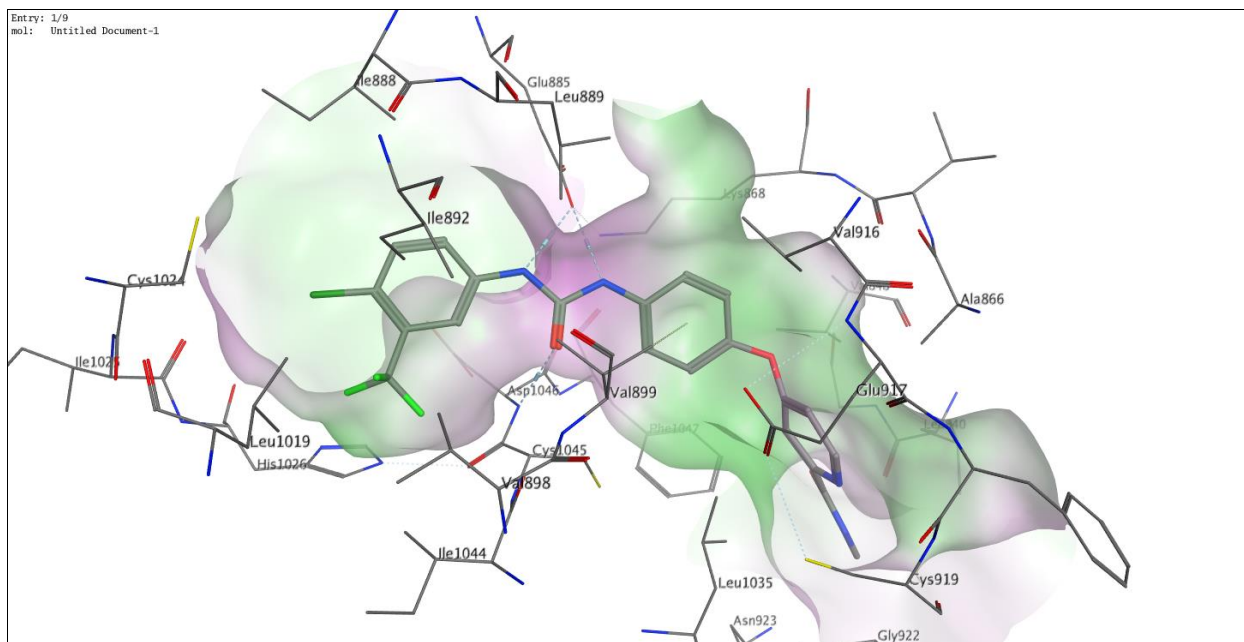

Figure S 2: Binding mode of sorafenib

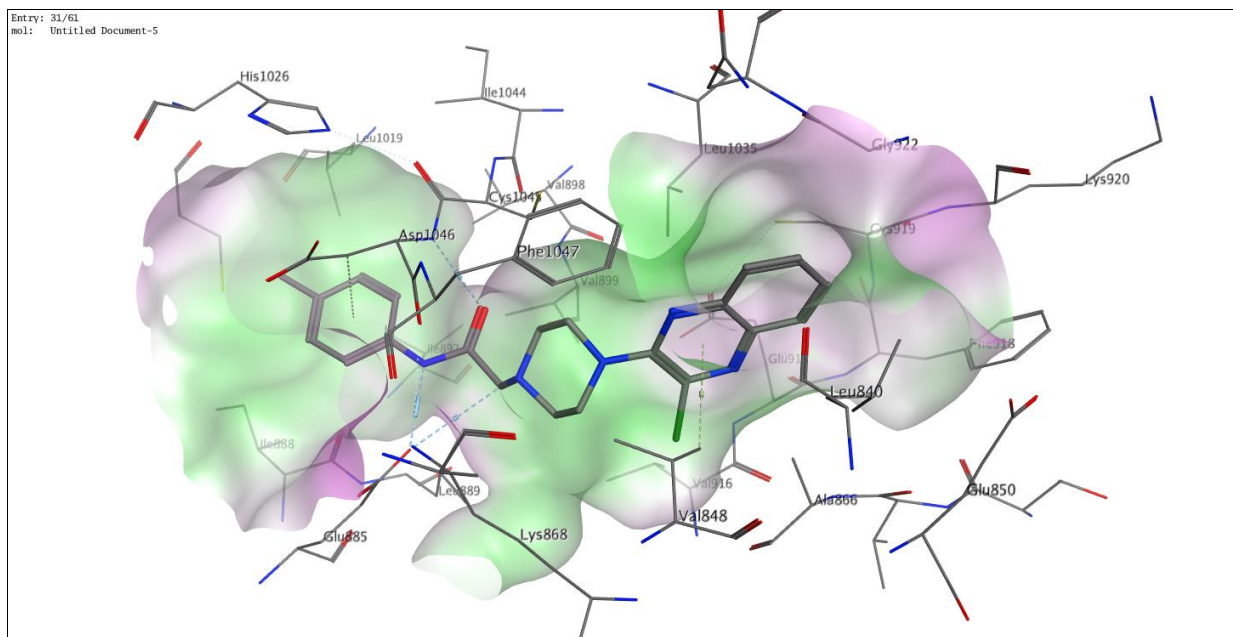

Figure S 3: 3D interaction of compound **10<sub>e</sub>**

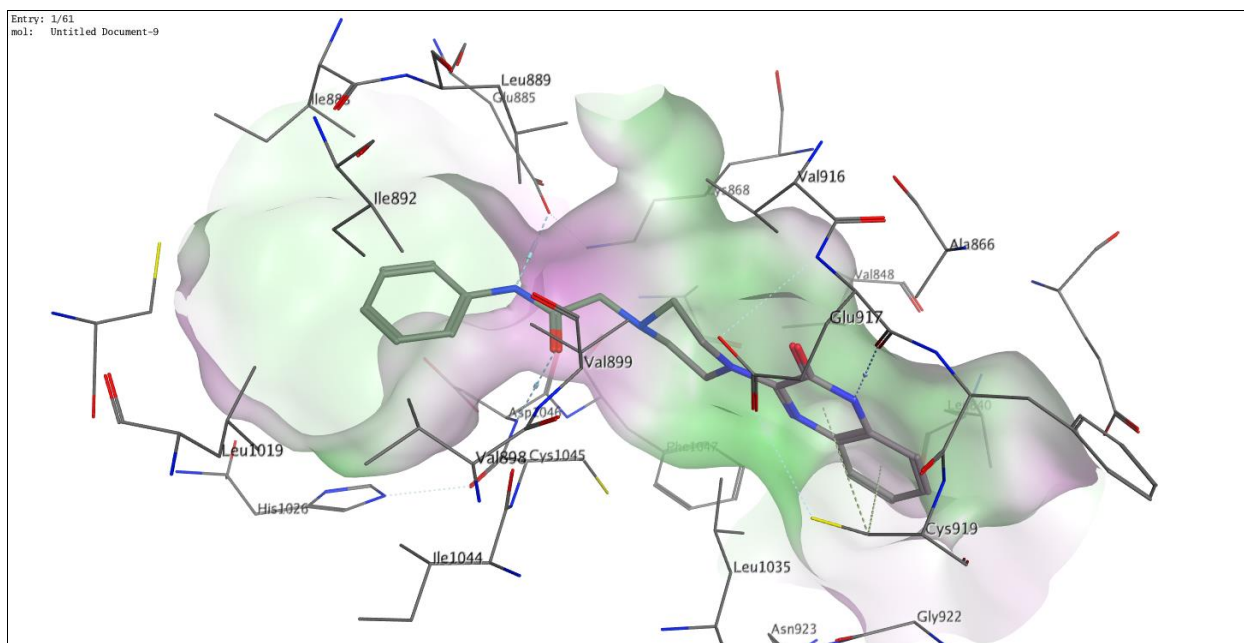

Figure S 4: Binding pattern of compound **13<sub>a</sub>**

Abdallah ElSayed\_H\_401

Microanalytical Unit - FOPCU - NMR laboratory  
www.pharma.cu.edu.eg dir-mau.fopcu@pharma.cu.edu.eg

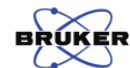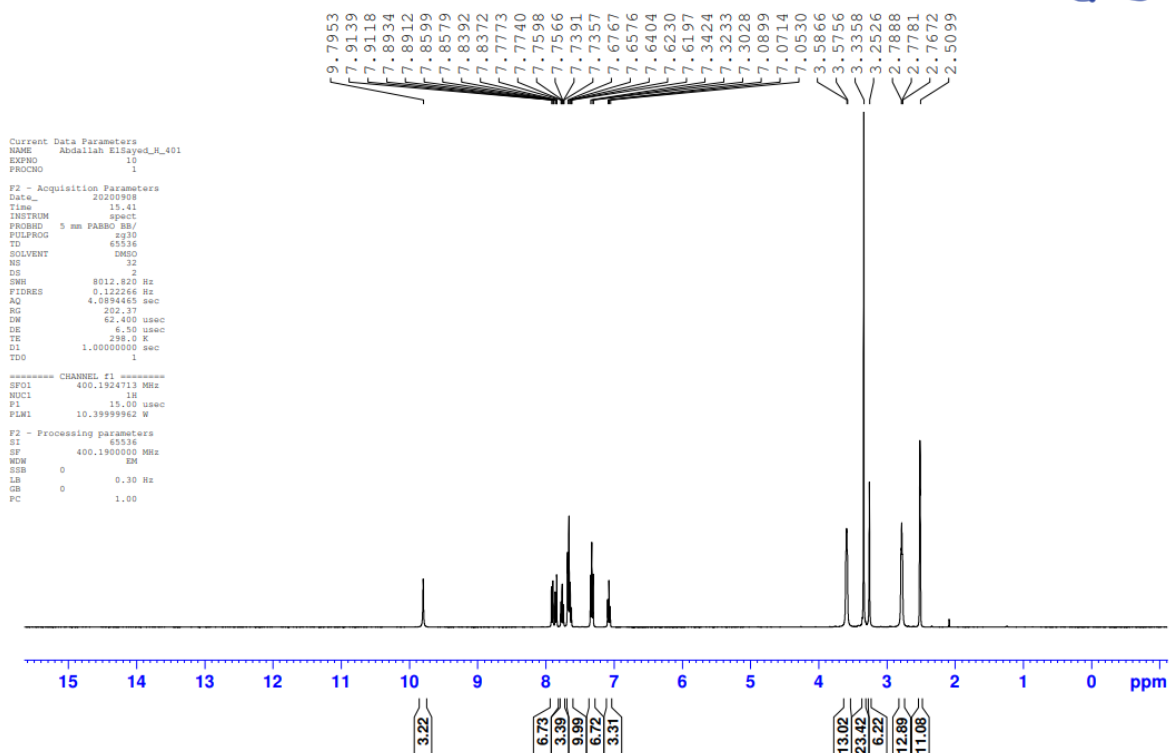

Figure S 5:  $^1\text{H}$ NMR chart of compound **10<sub>a</sub>**

Abdallah ElSayed\_C\_401

Microanalytical Unit - FOPCU - NMR laboratory  
www.pharma.cu.edu.eg dir-mau.fopcu@pharma.cu.edu.eg

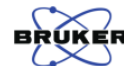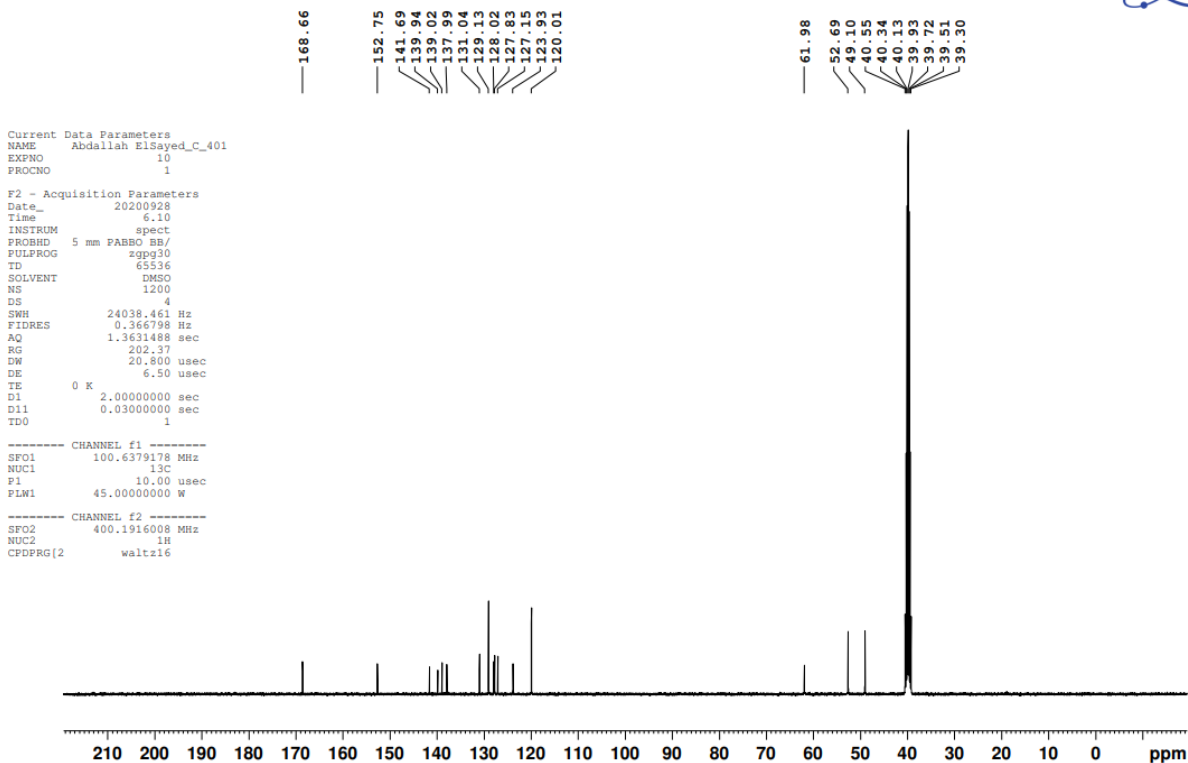

Figure S 6:  $^{13}\text{C}$ NMR chart of compound **10a**

Abdallah ElSayed\_H\_402#

Microanalytical Unit - FOPCU - NMR laboratory  
www.pharma.cu.edu.eg dir-mau.fopcu@pharma.cu.edu.eg

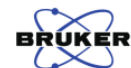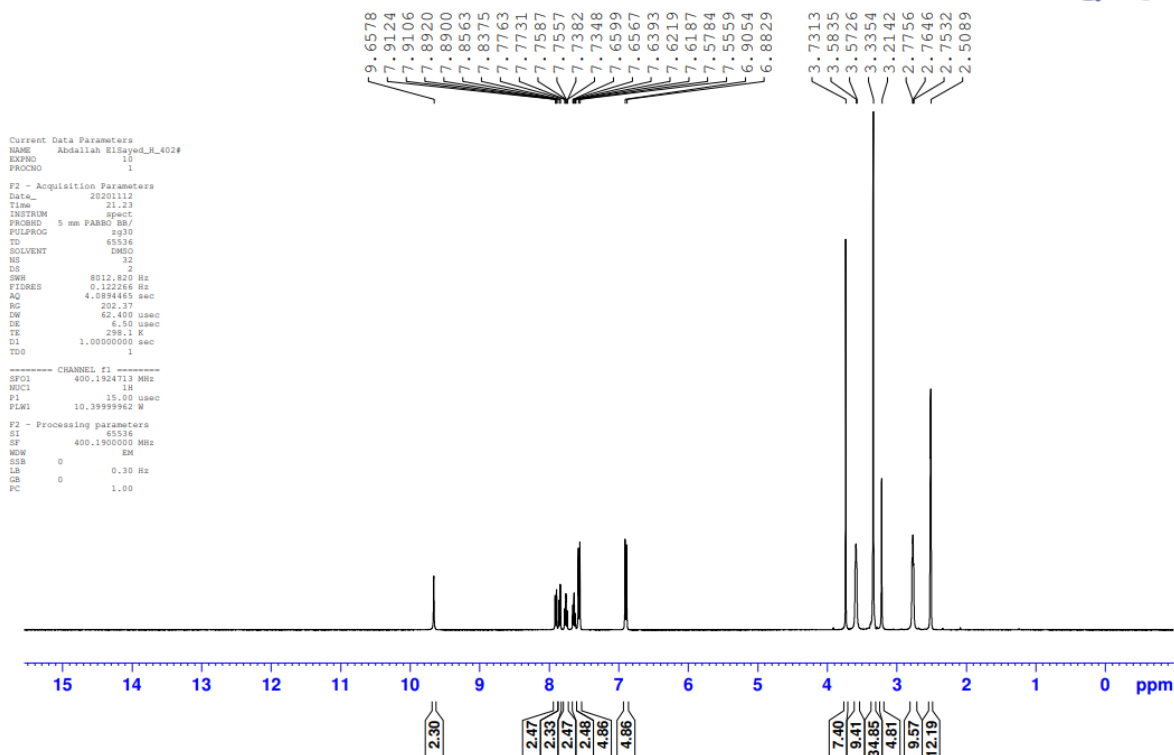

Figure S 7:  $^1\text{H}$ NMR chart of compound **10b**

Abdallah ElSayed\_C\_402

Microanalytical Unit - FOPCU - NMR laboratory  
www.pharma.cu.edu.eg dir-mau.fopcu@pharma.cu.edu.eg

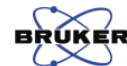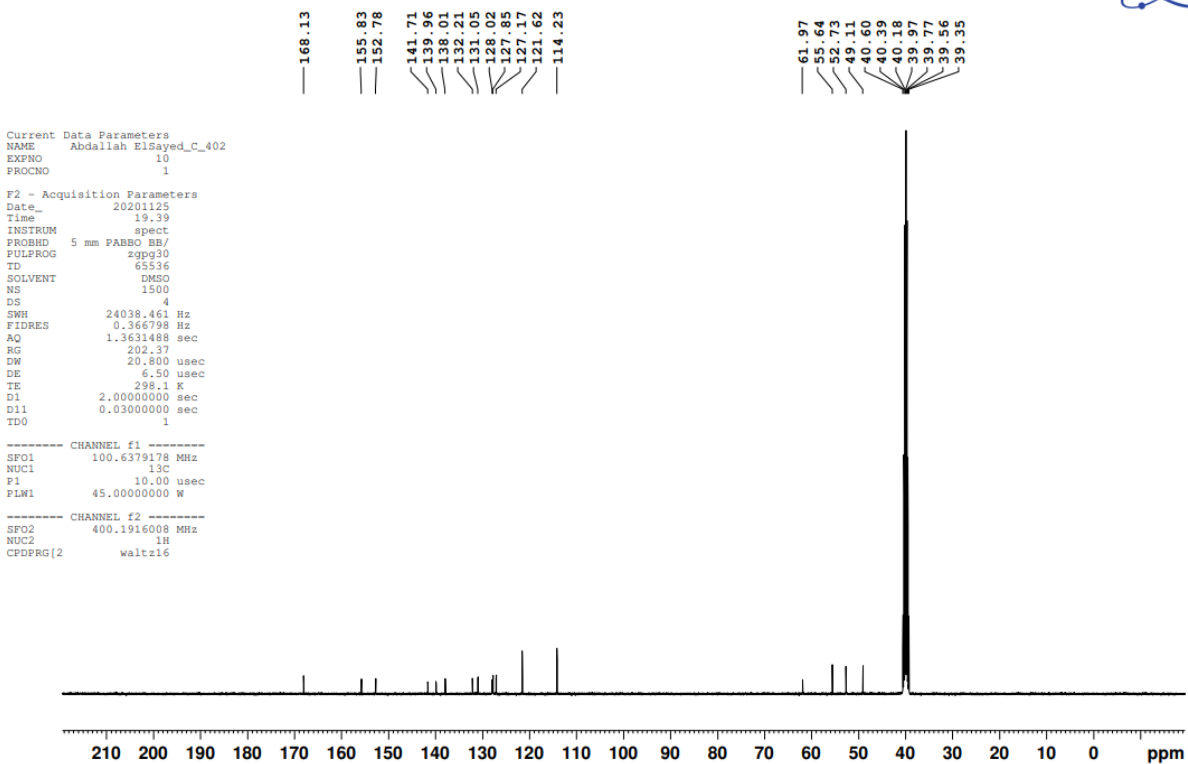

Figure S 8:  $^{13}\text{C}$ NMR chart of compound **10<sub>b</sub>**

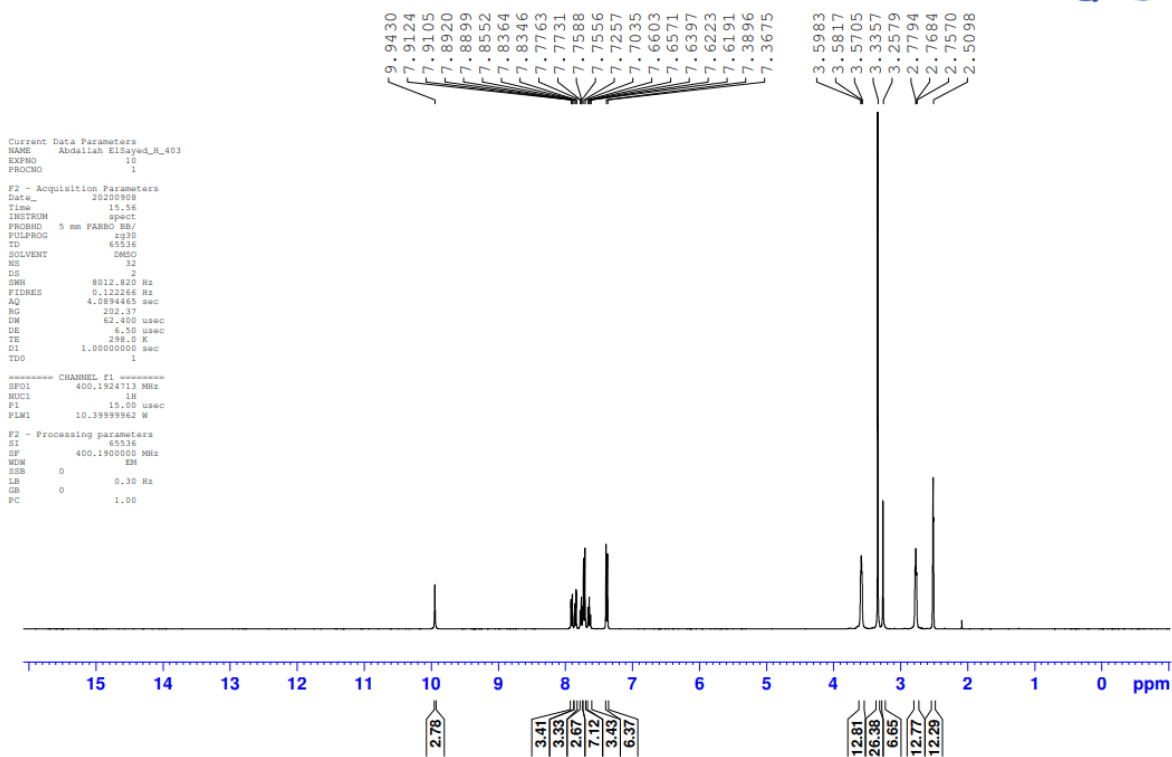Figure S 9:  $^1\text{H}$ NMR chart of compound **10<sub>c</sub>**

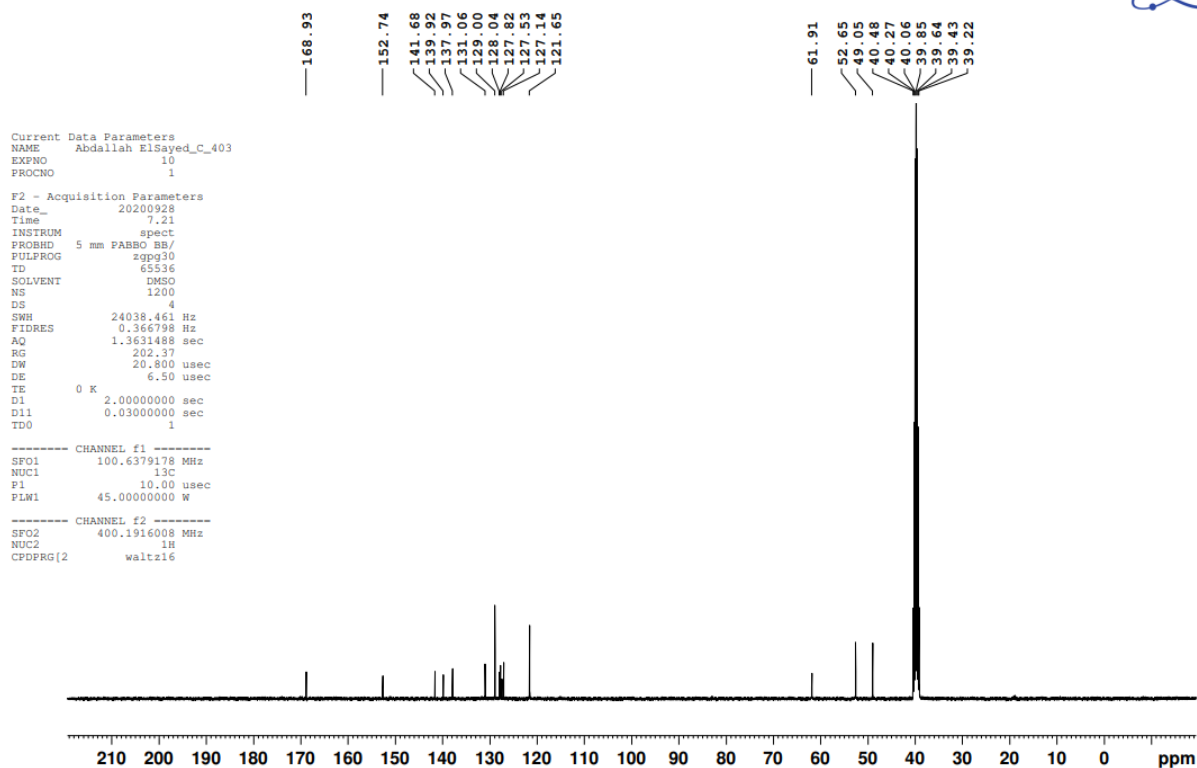Figure S 10:  $^{13}\text{C}$ NMR chart of compound **10c**



Abdallah ElSayed\_H\_404

Microanalytical Unit - FOPCU - NMR laboratory  
www.pharma.cu.edu.eg dir-mau.fopcu@pharma.cu.edu.eg

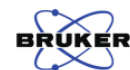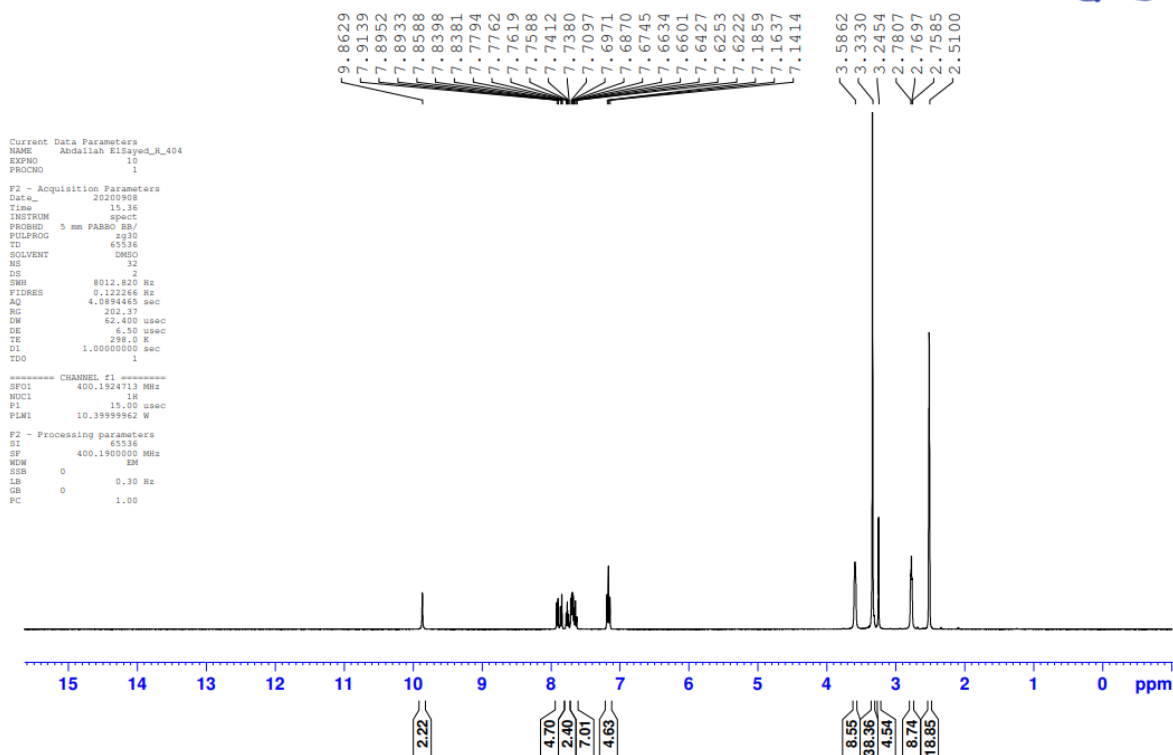

Figure S 11: <sup>1</sup>HNMR chart of compound **10<sub>d</sub>**

Abdallah ElSayed\_C\_404

Microanalytical Unit - FOPCU - NMR laboratory  
www.pharma.cu.edu.eg dir-mau.fopcu@pharma.cu.edu.eg

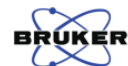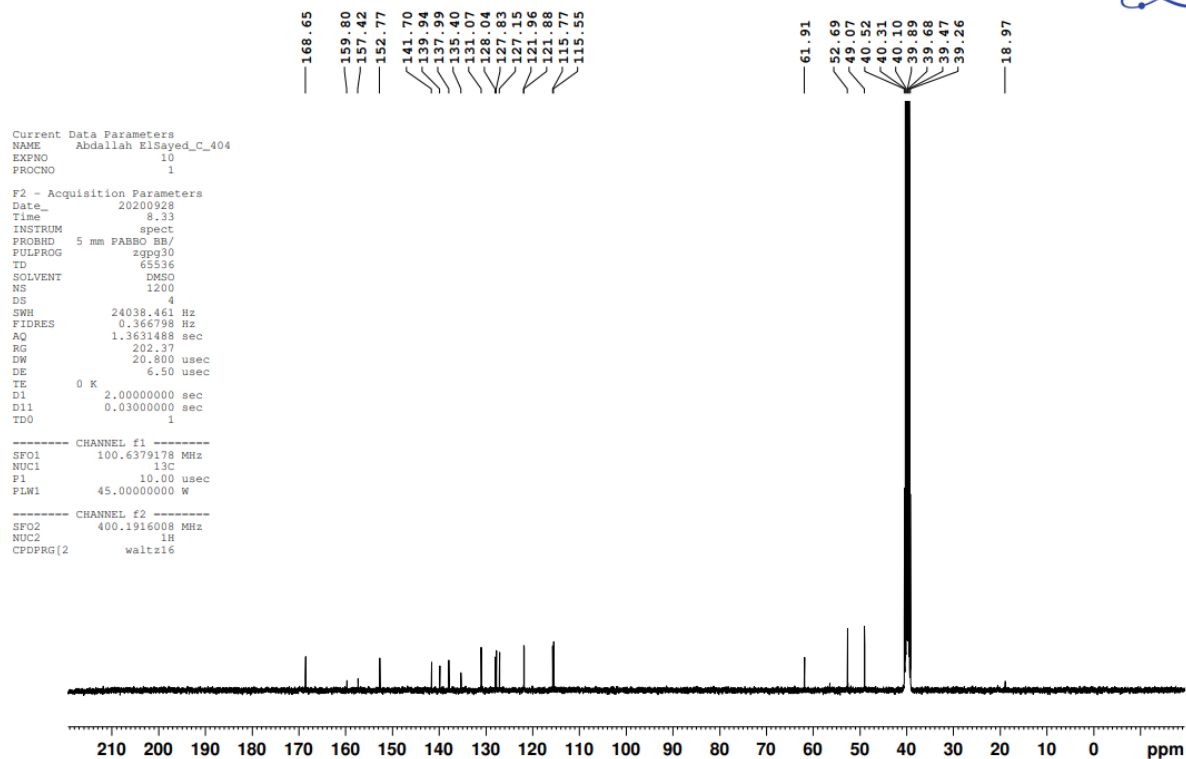

Figure S 12:  $^{13}\text{C}$ NMR chart of compound  $10_d$

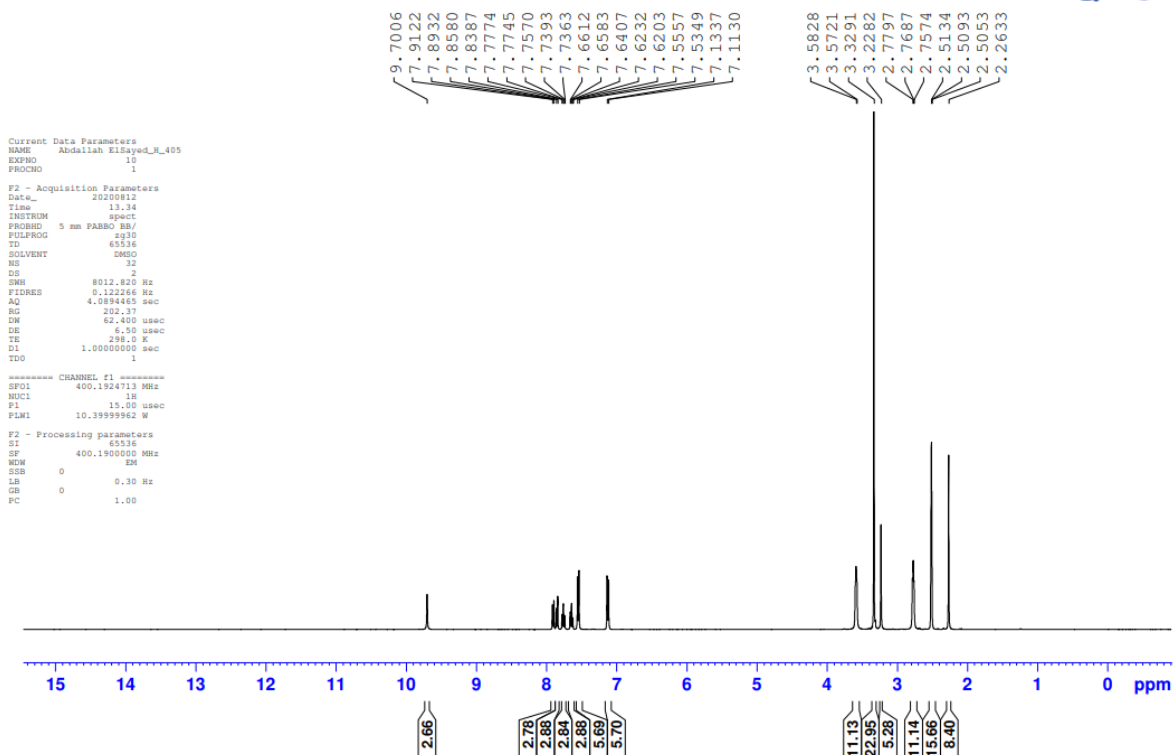Figure S 13:  $^1\text{H}$ NMR chart of compound **10e**

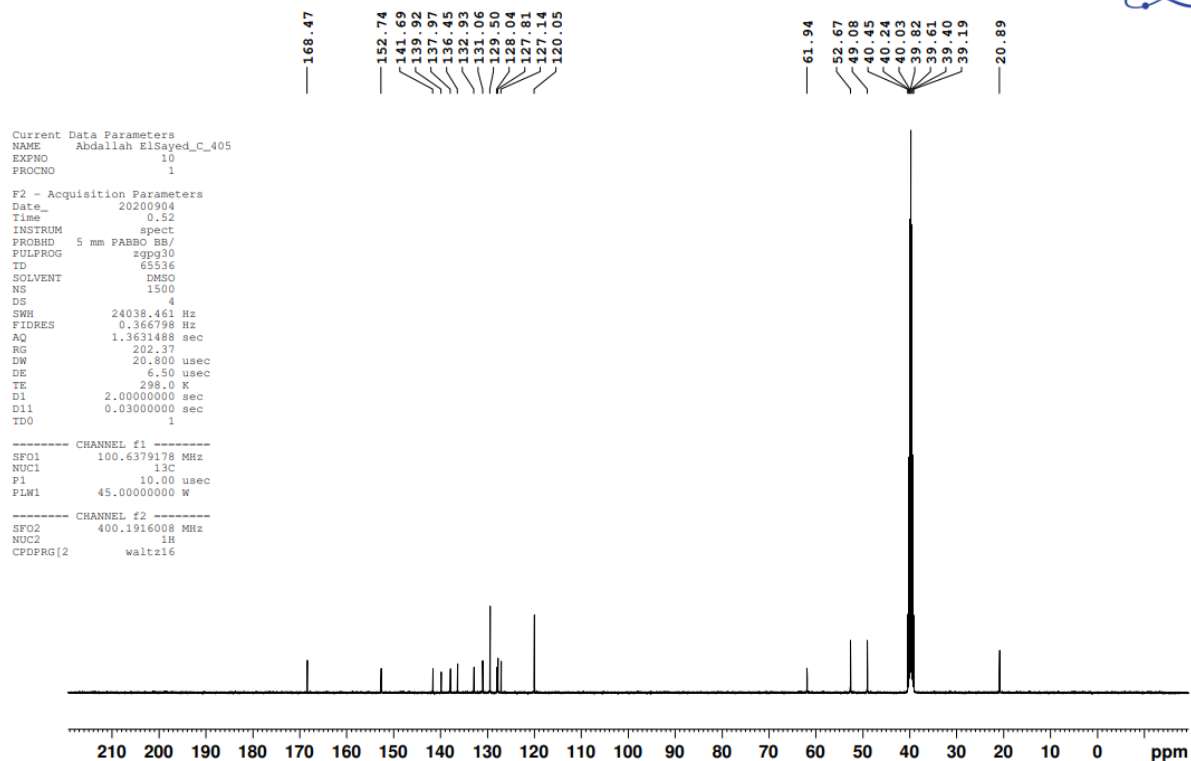Figure S 14:  $^{13}\text{C}$ NMR chart of compound **10e**

Abdallah ElSayed\_H\_406

Microanalytical Unit - FOPCU - NMR laboratory  
www.pharma.cu.edu.eg dir-mau.fopcu@pharma.cu.edu.eg

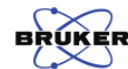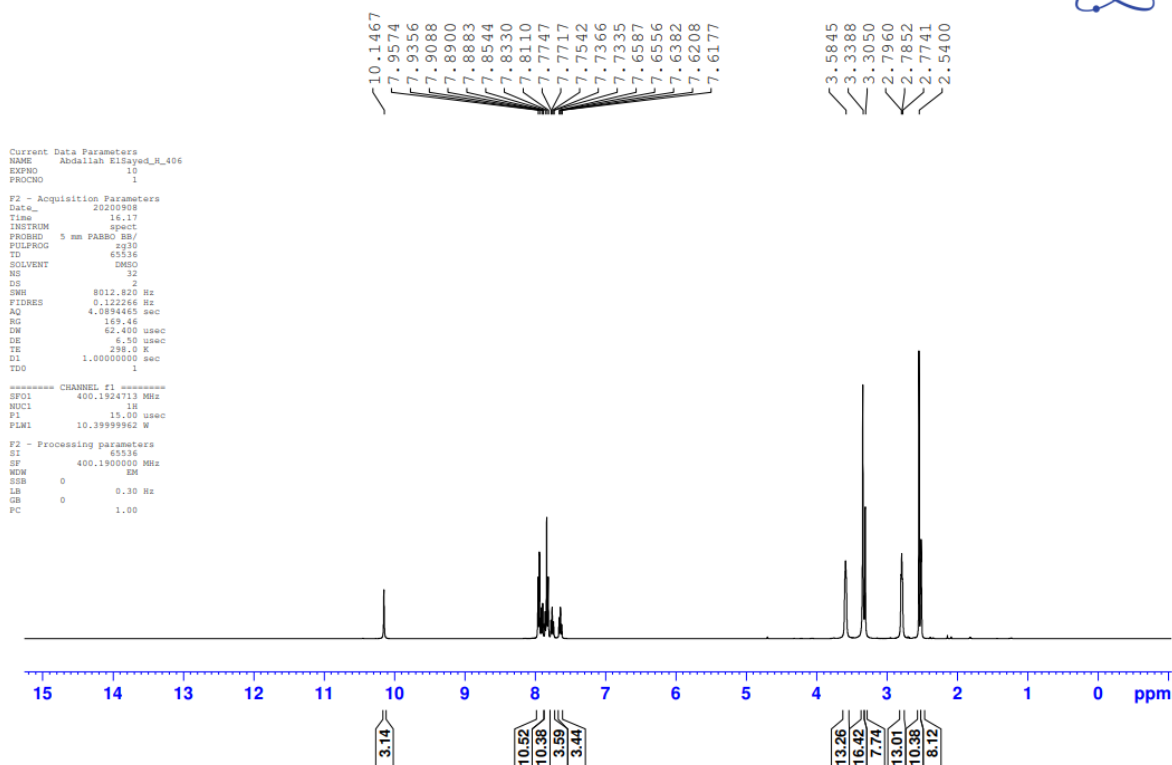

Figure S 15: <sup>1</sup>HNMR chart of compound 10j

Abdallah ElSayed\_C\_406

Microanalytical Unit - FOPCU - NMR laboratory  
www.pharma.cu.edu.eg dir-mau.fopcu@pharma.cu.edu.eg

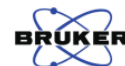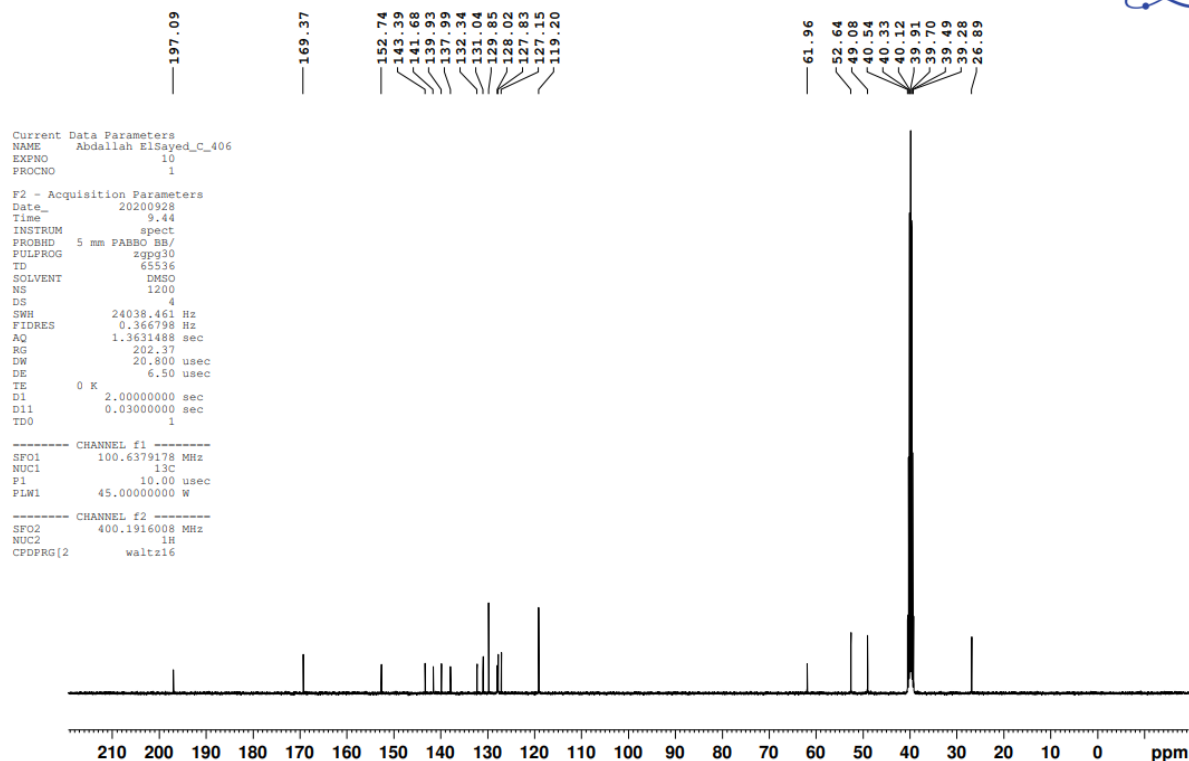

Figure S 16:  $^{13}\text{C}$ NMR chart of compound  $10_f$

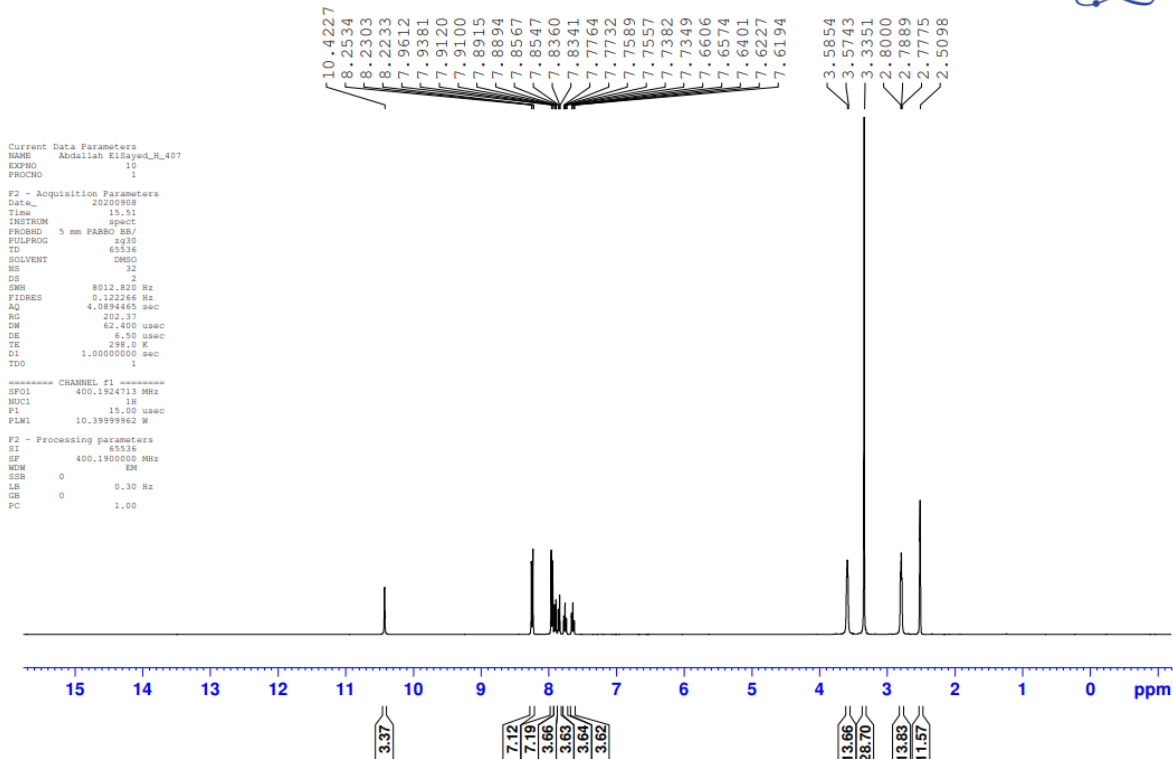Figure S 17:  $^1\text{H}$ NMR chart of compound  $10_g$

Abdallah ElSayed\_H\_407\_D2O

Microanalytical Unit - FOPCU - NMR laboratory  
www.pharma.cu.edu.eg dir-mau.fopcu@pharma.cu.edu.eg

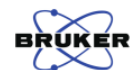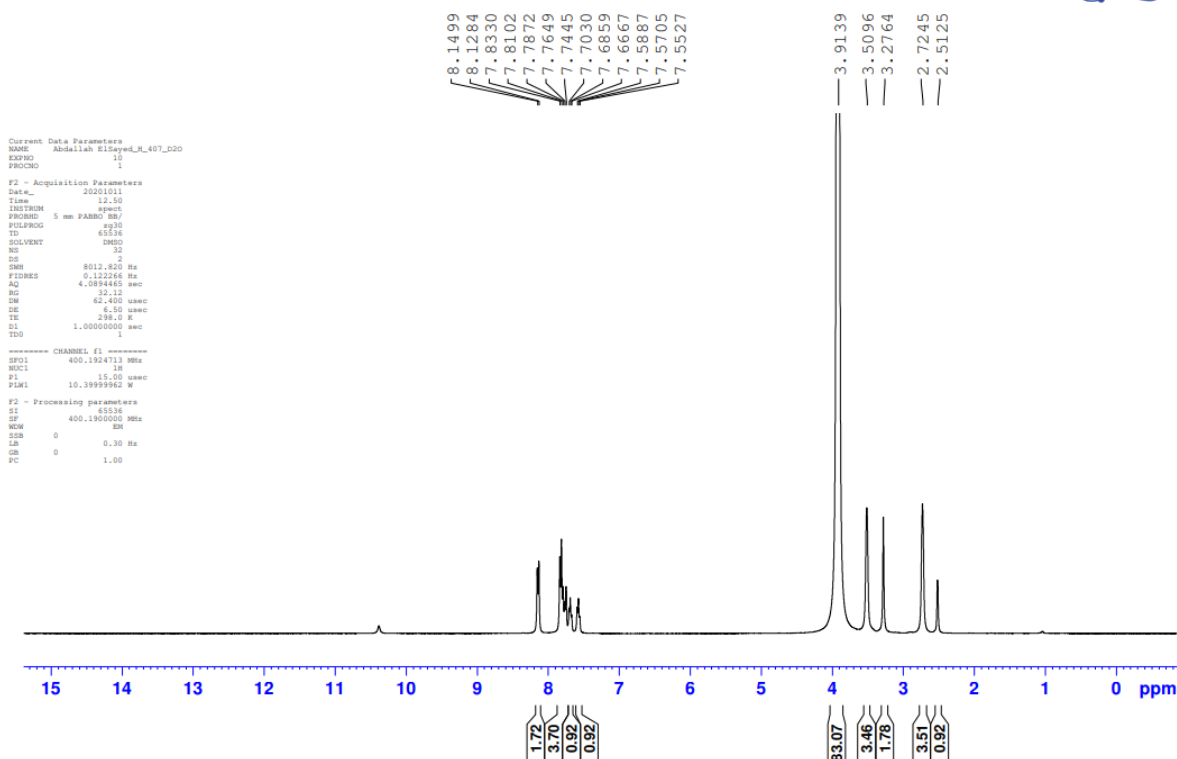

Figure S 18 : D<sub>2</sub>O <sup>1</sup>H NMR chart of compound 10<sub>g</sub>



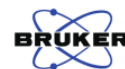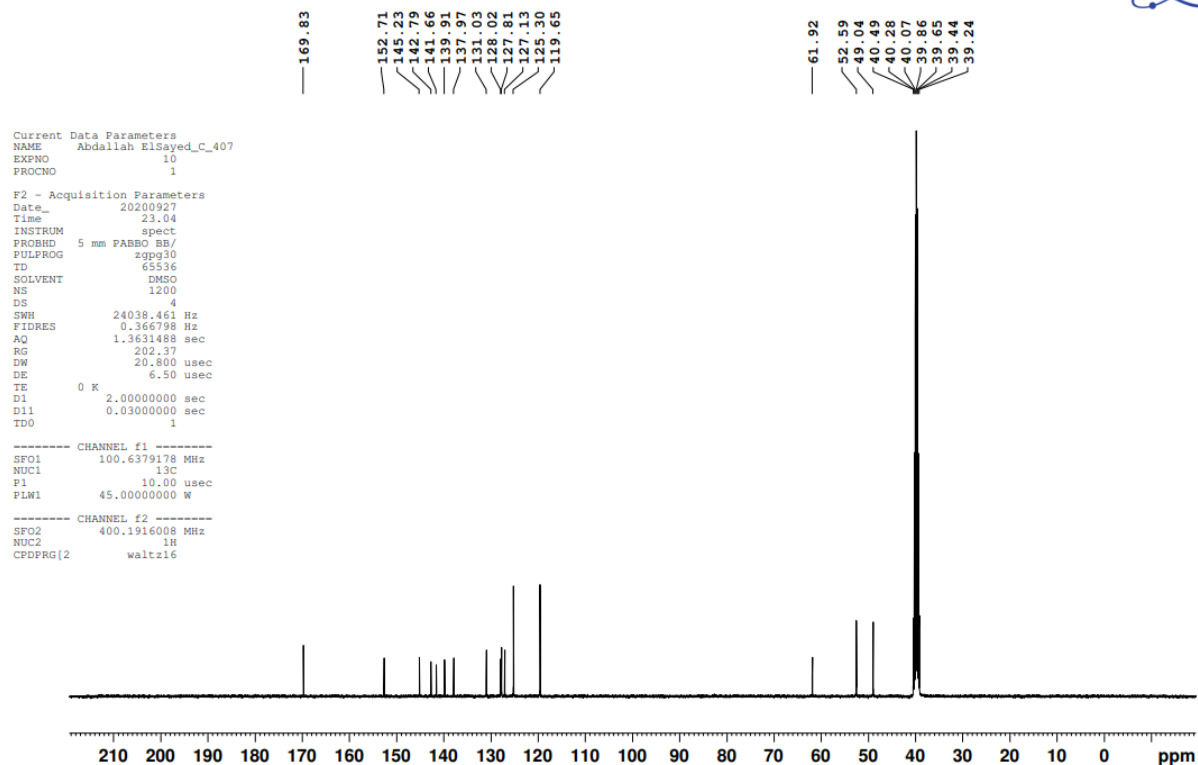Figure S 19:  $^{13}\text{C}$ NMR chart of compound **10<sub>g</sub>**

Abdallah ElSayed\_H\_409

Microanalytical Unit - FOPCU - NMR laboratory  
www.pharma.cu.edu.eg dir-mau.fopcu@pharma.cu.edu.eg

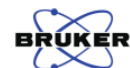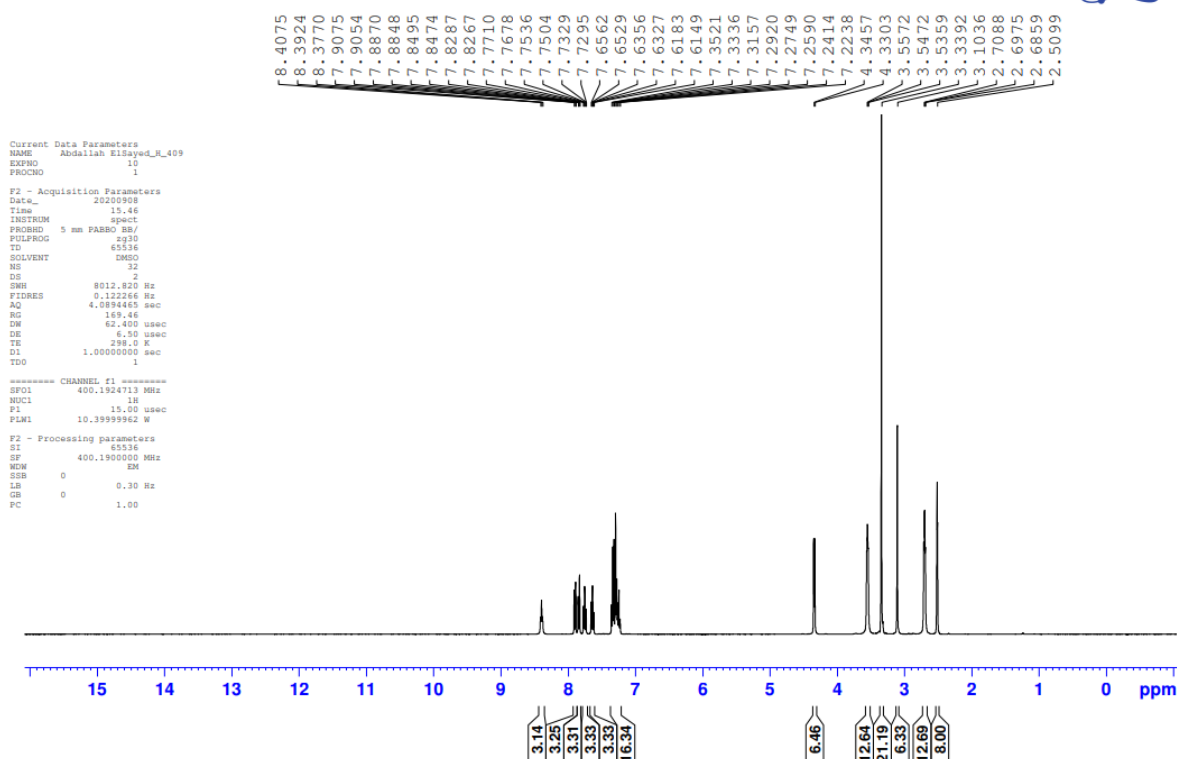

Figure S 20: <sup>1</sup>HNMR chart of compound 11

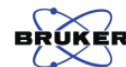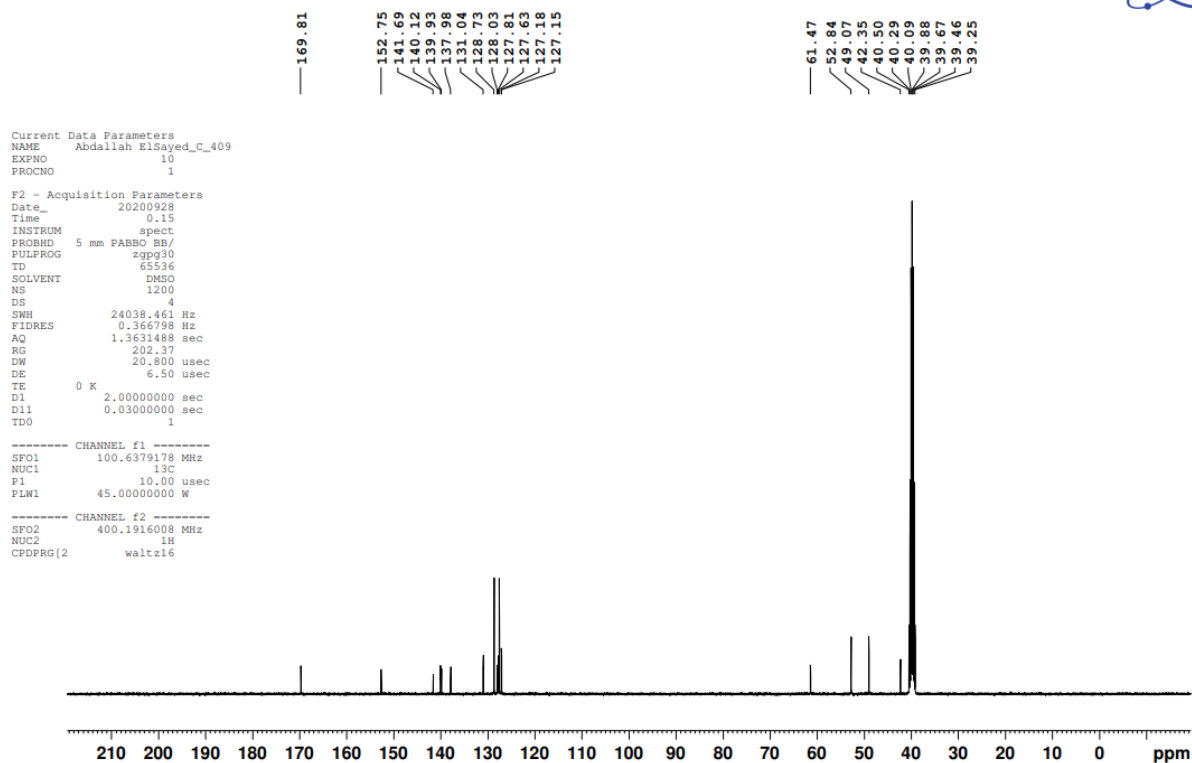Figure S 21: <sup>13</sup>CNMR chart of compound 11

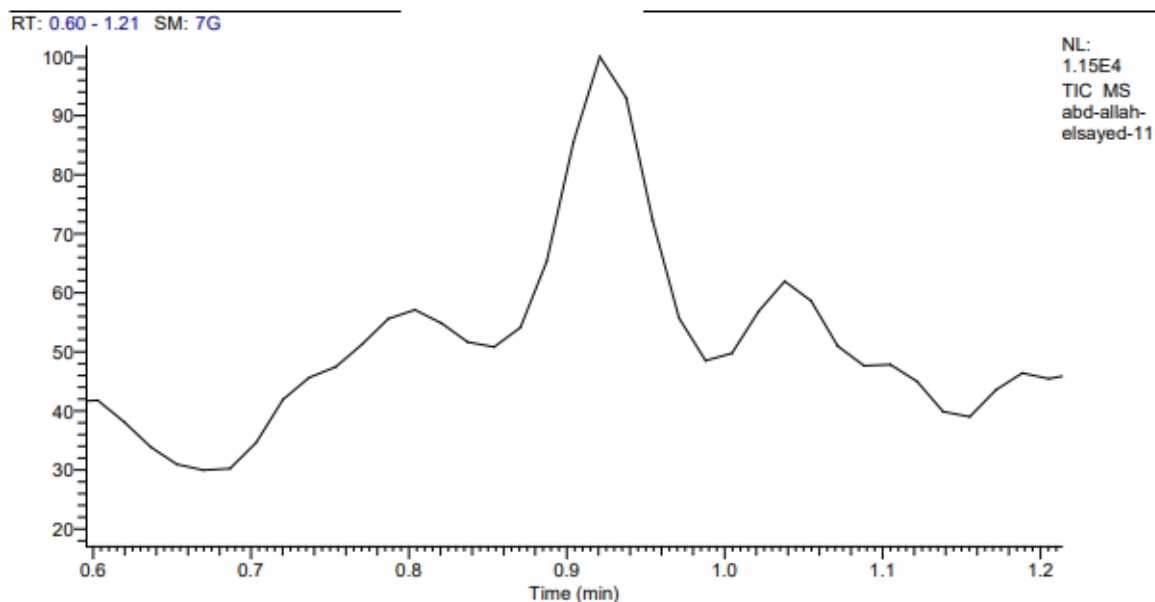

abd-allah-elsayed-11 #54-59 RT: 0.92-1.00 AV: 6 NL: 1.03E2  
T: + c EI Full ms [40.00-1000.00]

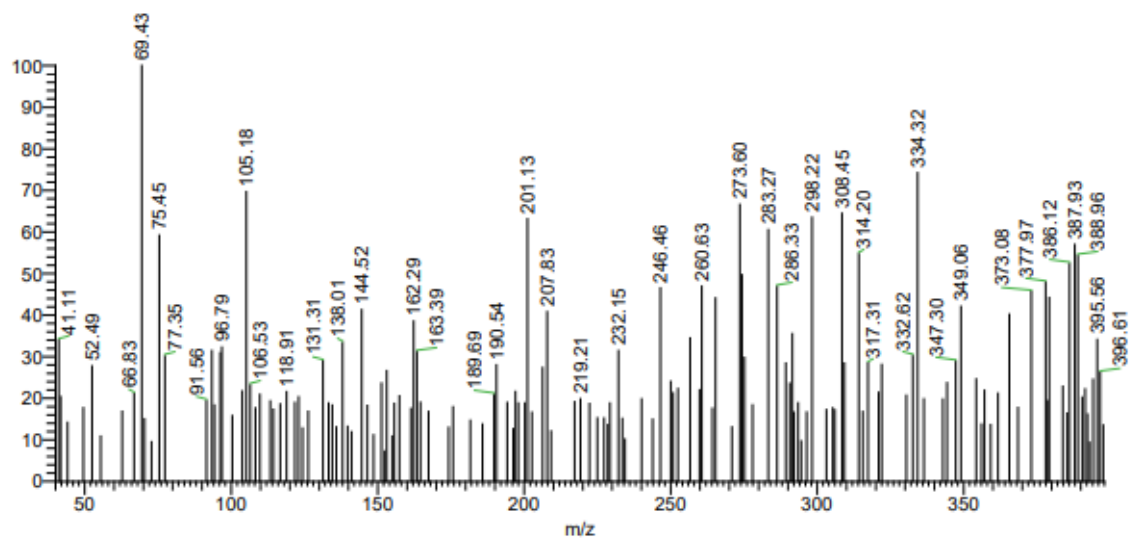

Figure S 22: Mass spec. of compound 11

Abdallah ElSayed\_H\_421

Microanalytical Unit - FOPCU - NMR laboratory  
www.pharma.cu.edu.eg dir-mau.fopcu@pharma.cu.edu.eg

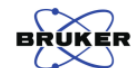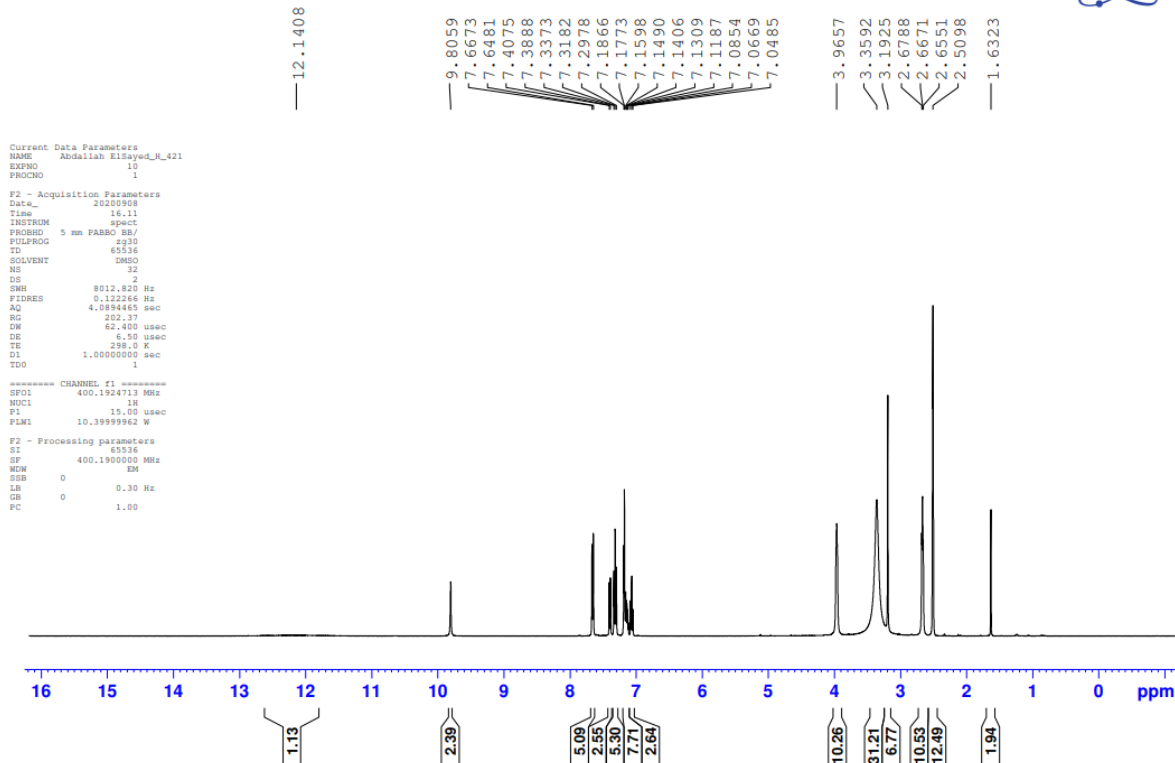

Figure S 23: <sup>1</sup>H NMR chart of compound **13<sub>a</sub>**

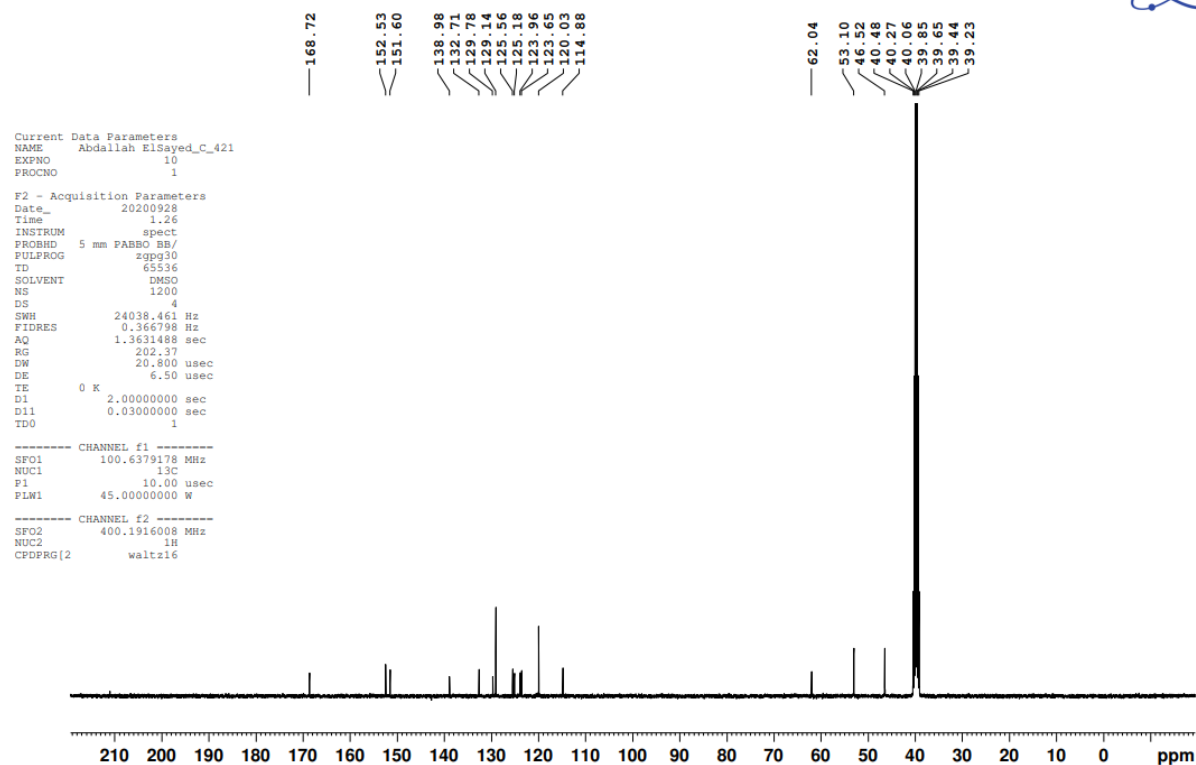

Figure S 24:  $^{13}\text{C}$ NMR chart of compound **13<sub>a</sub>**

Abdallah ElSayed\_H\_422

Microanalytical Unit - FOPCU - NMR laboratory  
www.pharma.cu.edu.eg dir-mau.fopcu@pharma.cu.edu.eg

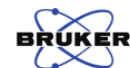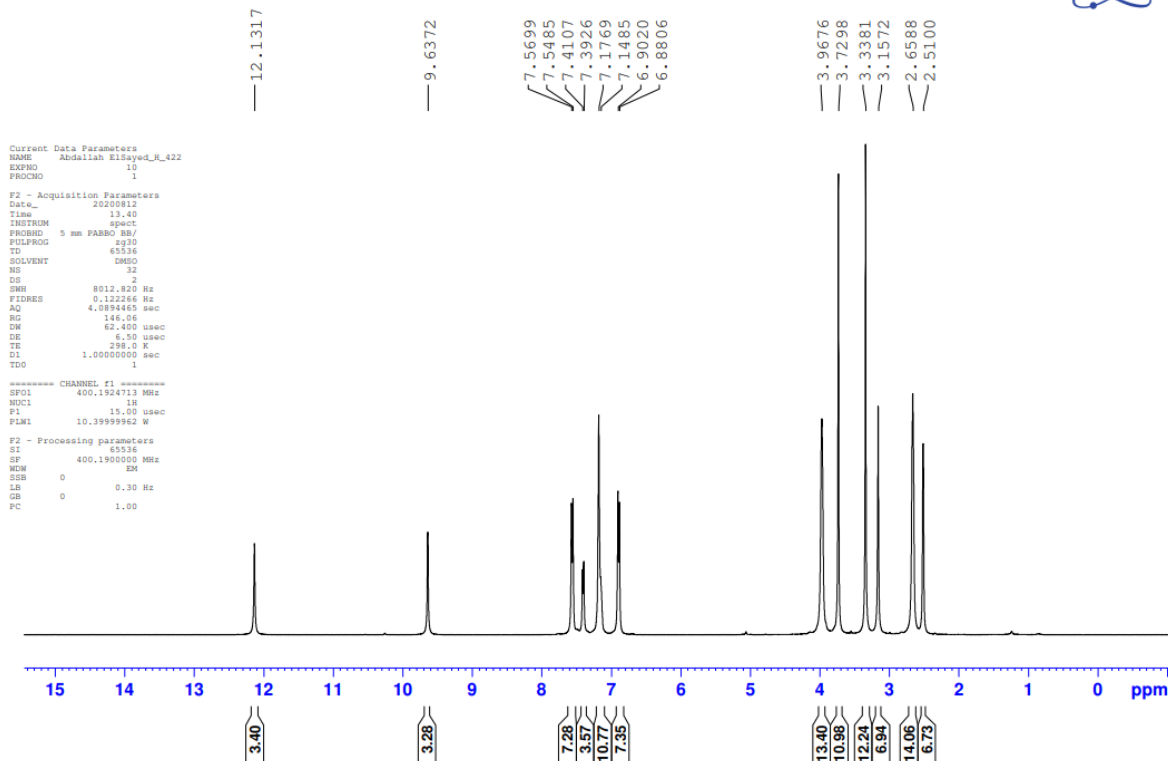

Figure S 25: <sup>1</sup>H NMR chart of compound **13<sub>b</sub>**

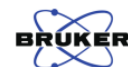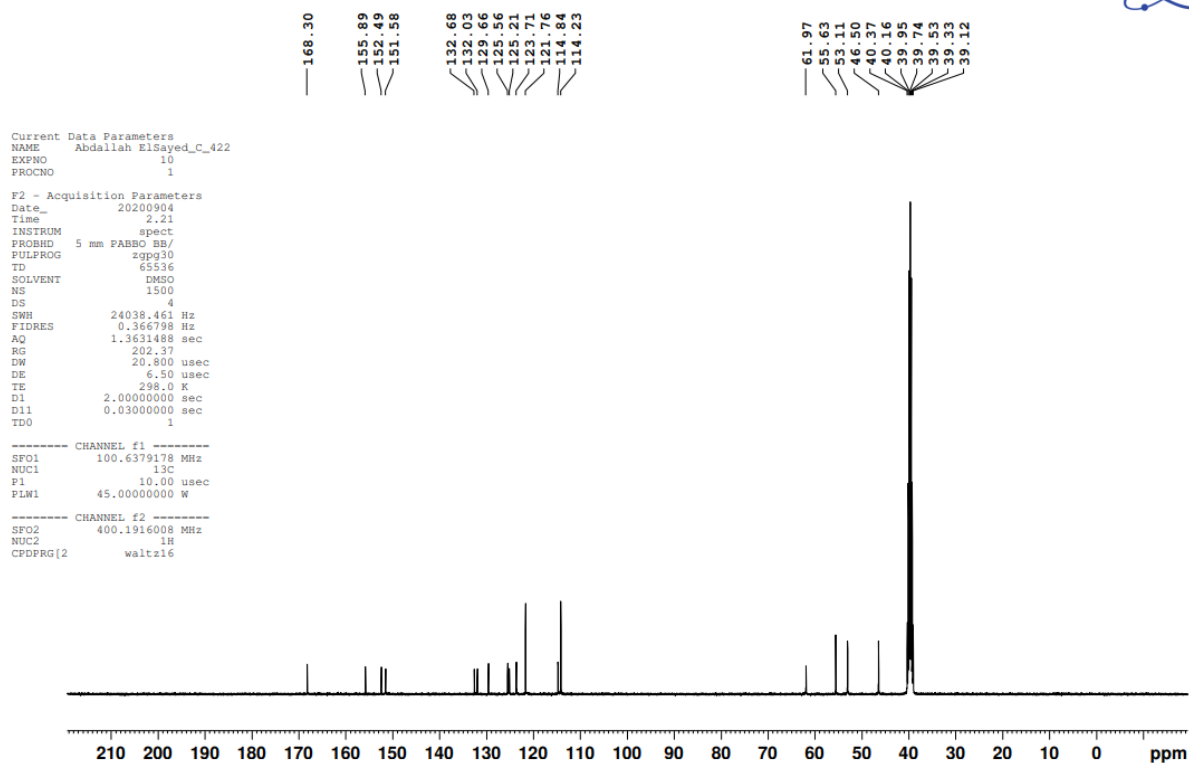Figure S 26:  $^{13}\text{C}$ NMR chart of compound **13<sub>b</sub>**



Abdallah ElSayed\_H\_423

Microanalytical Unit - FOPCU - NMR laboratory  
www.pharma.cu.edu.eg dir-mau.fopcu@pharma.cu.edu.eg

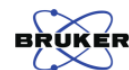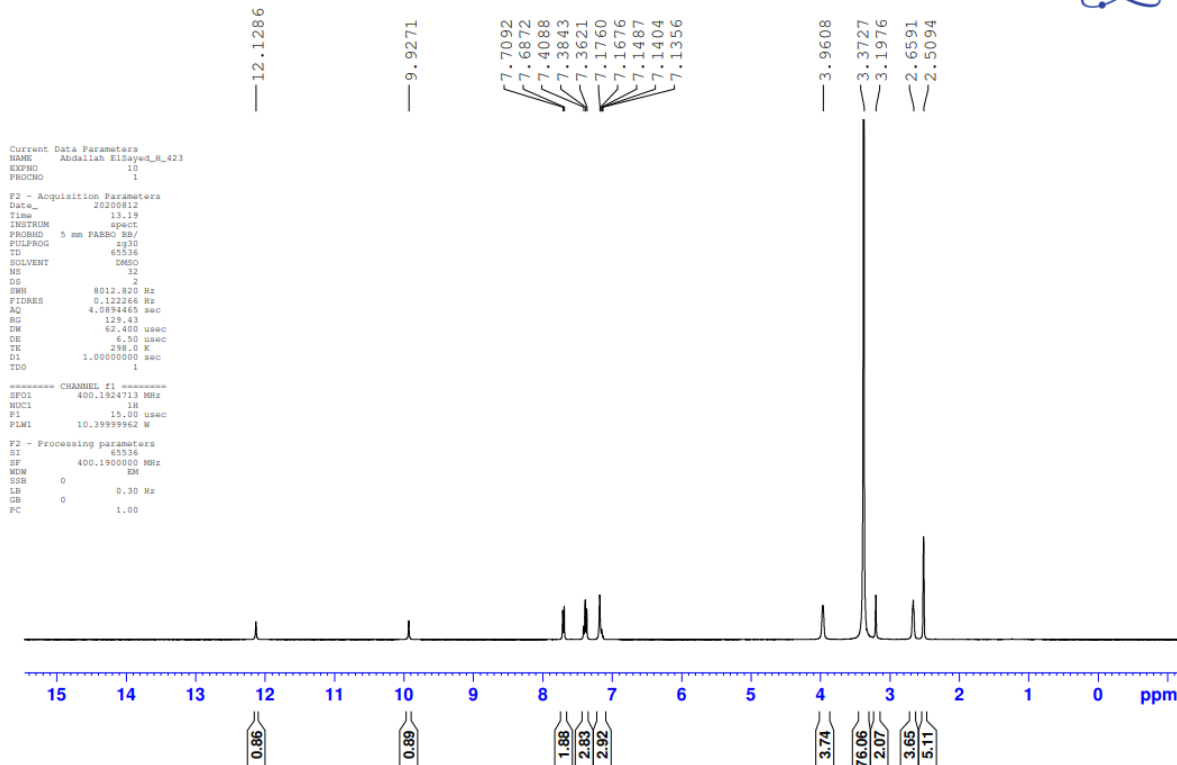

Figure S 27:  $^1\text{H}$ NMR chart of compound **13c**.

Abdallah ElSayed\_C\_423

Microanalytical Unit - FOPCU - NMR laboratory  
www.pharma.cu.edu.eg dir-mau.fopcu@pharma.cu.edu.eg

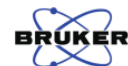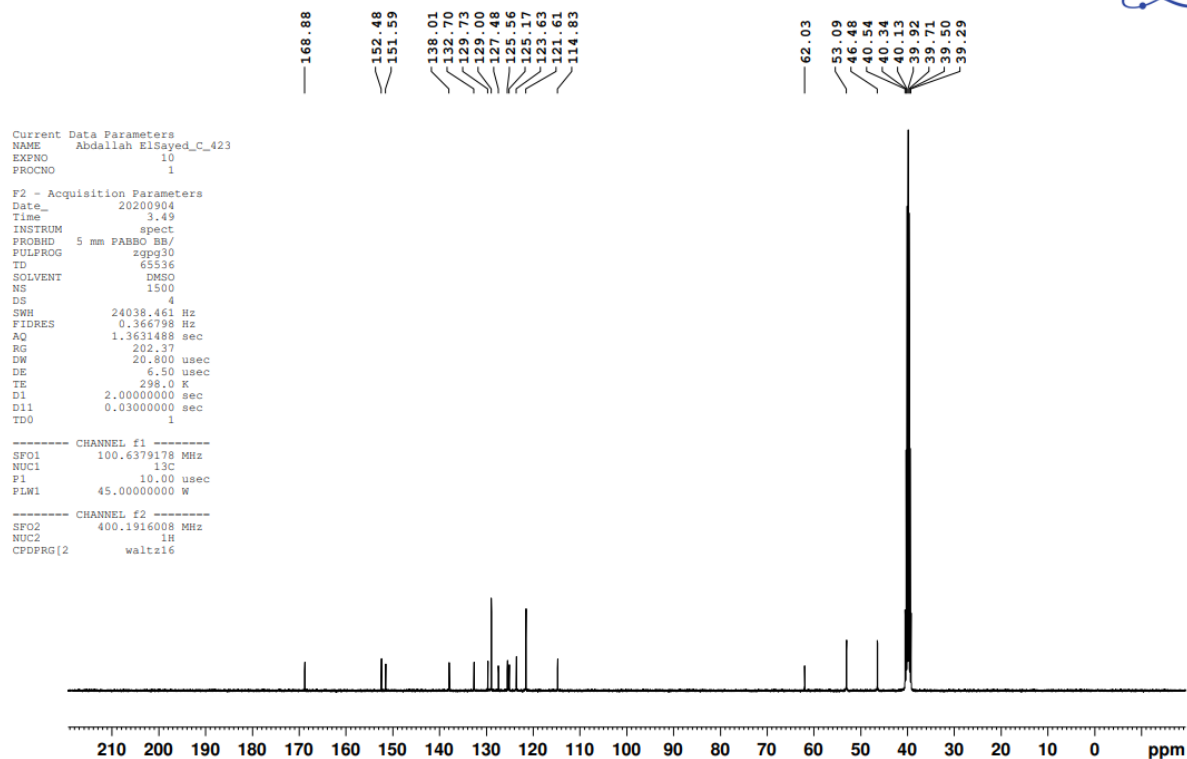

Figure S 28:  $^{13}\text{C}$ NMR chart of compound **13c**

Abdallah ElSayed\_H\_424

Microanalytical Unit - FOPCU - NMR laboratory  
www.pharma.cu.edu.eg dir-mau.fopcu@pharma.cu.edu.eg

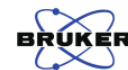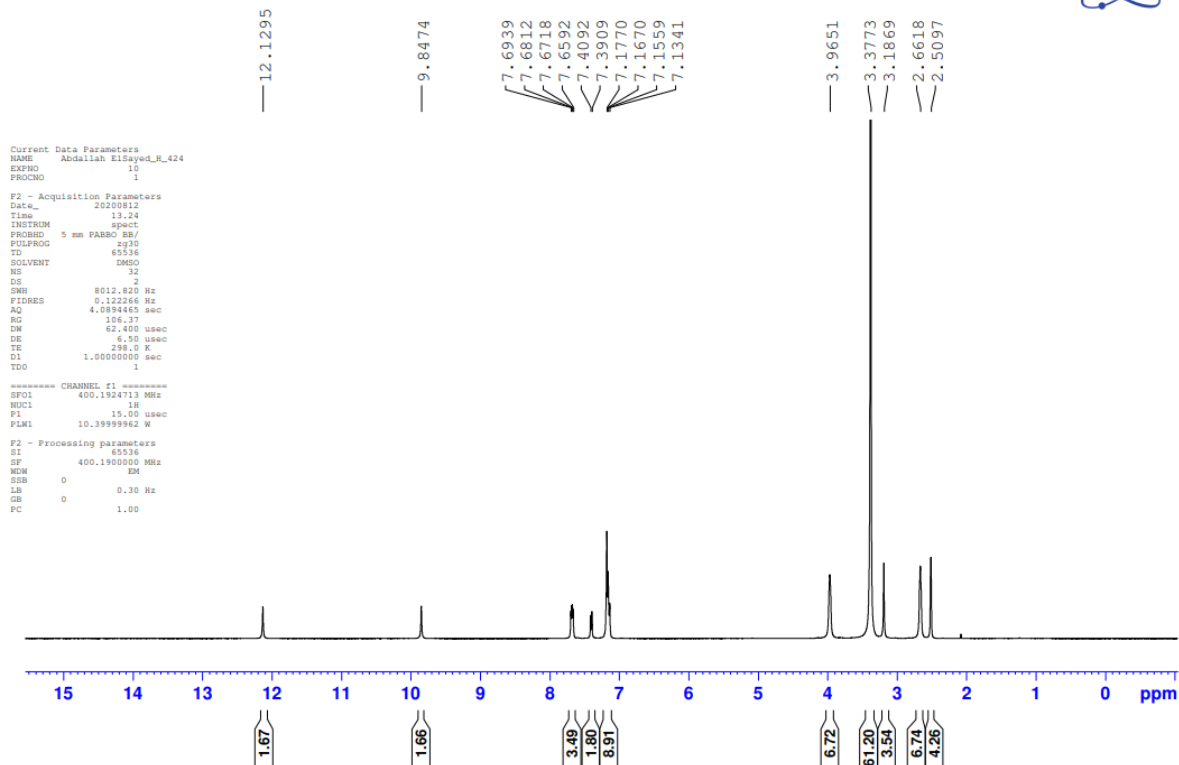

Figure S 29: <sup>1</sup>HNMR chart of compound **13d**

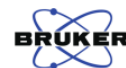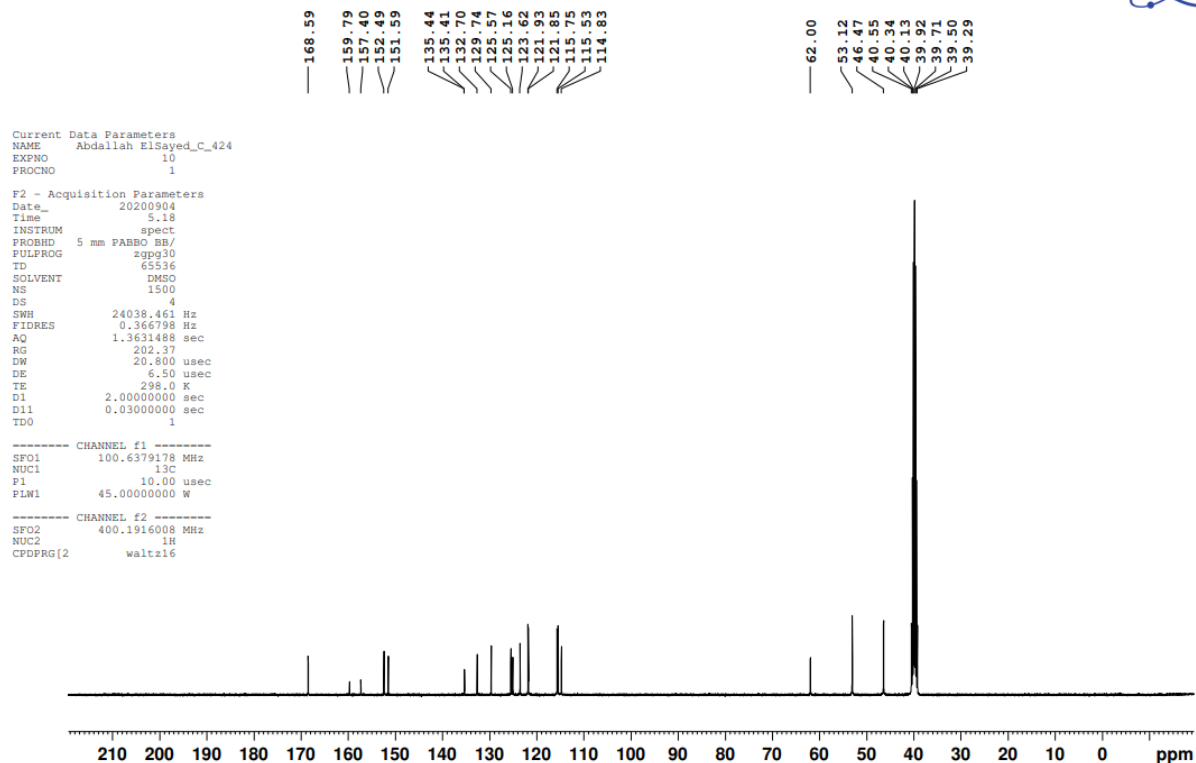Figure S 30:  $^{13}\text{C}$ NMR chart of compound **13<sub>d</sub>**

Abdallah ElSayed\_H\_425

Microanalytical Unit - FOPCU - NMR laboratory  
www.pharma.cu.edu.eg dir-mau.fopcu@pharma.cu.edu.eg

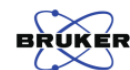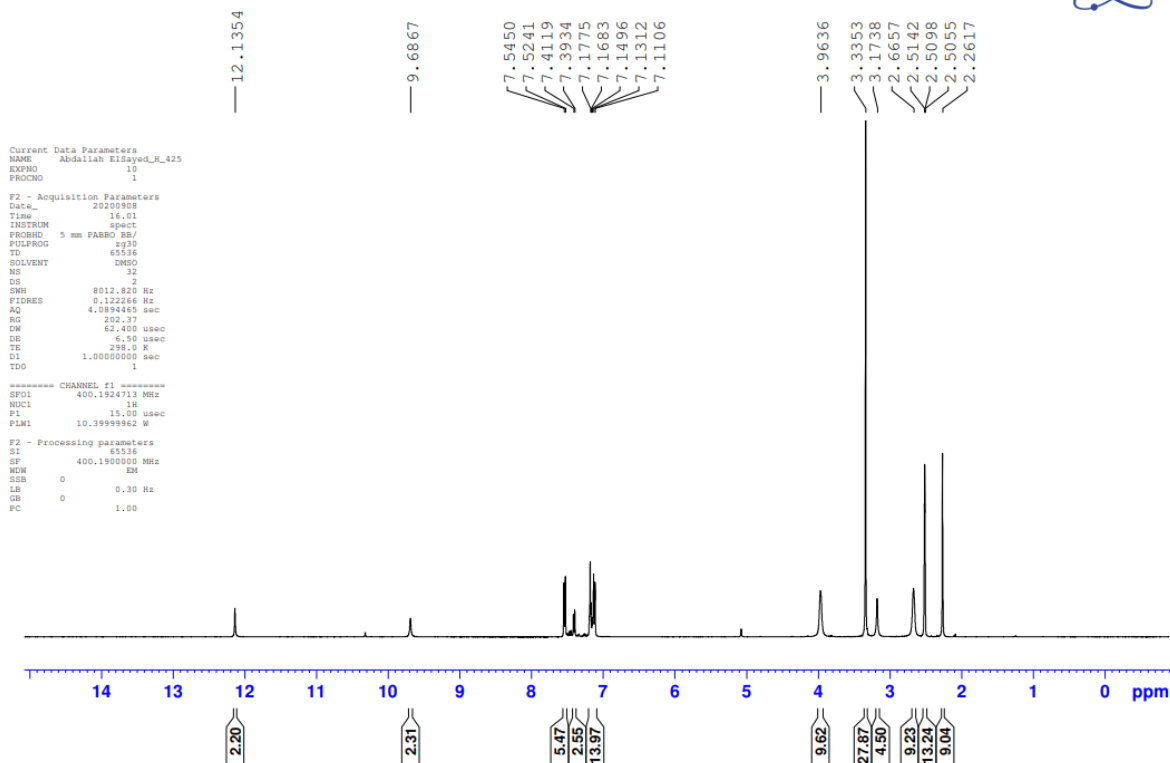

Figure S 31: <sup>1</sup>HNMR chart of compound **13<sub>e</sub>**

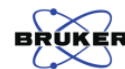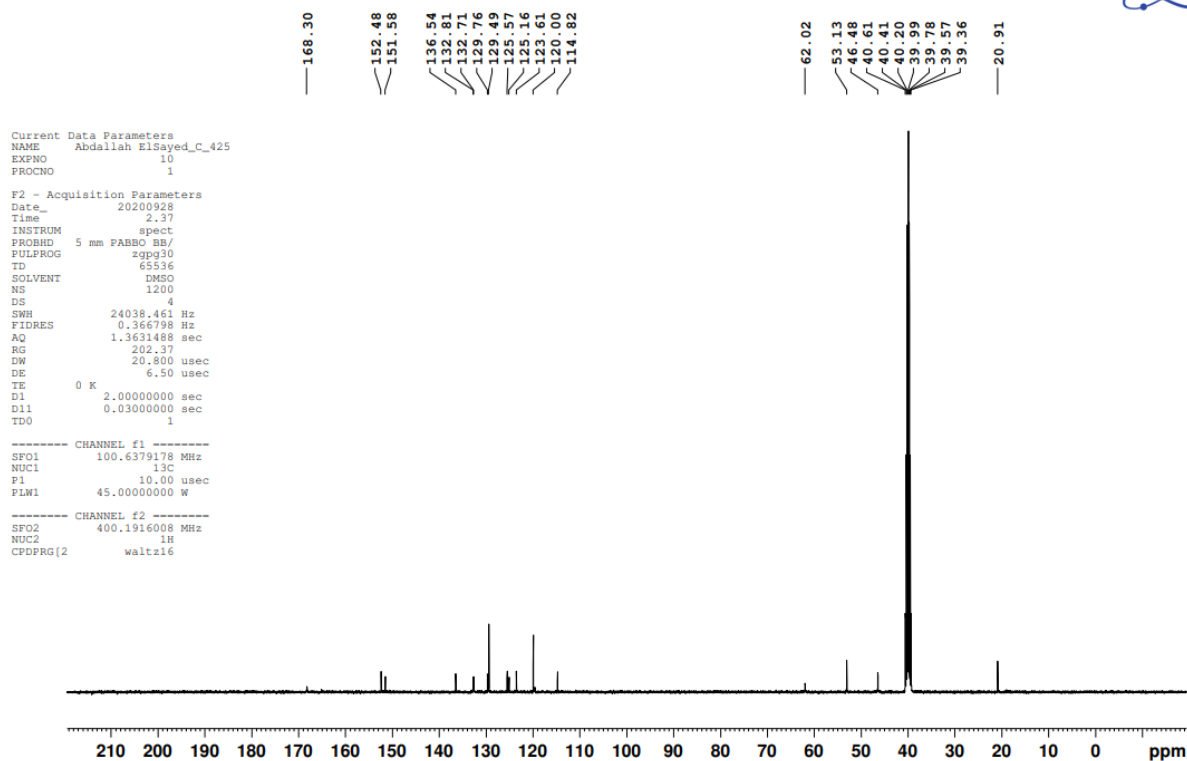Figure S 32:  $^{13}\text{C}$ NMR chart of compound **13<sub>e</sub>**

Abdallah ElSayed\_H\_426

Microanalytical Unit - FOPCU - NMR laboratory  
www.pharma.cu.edu.eg dir-mau.fopcu@pharma.cu.edu.eg

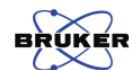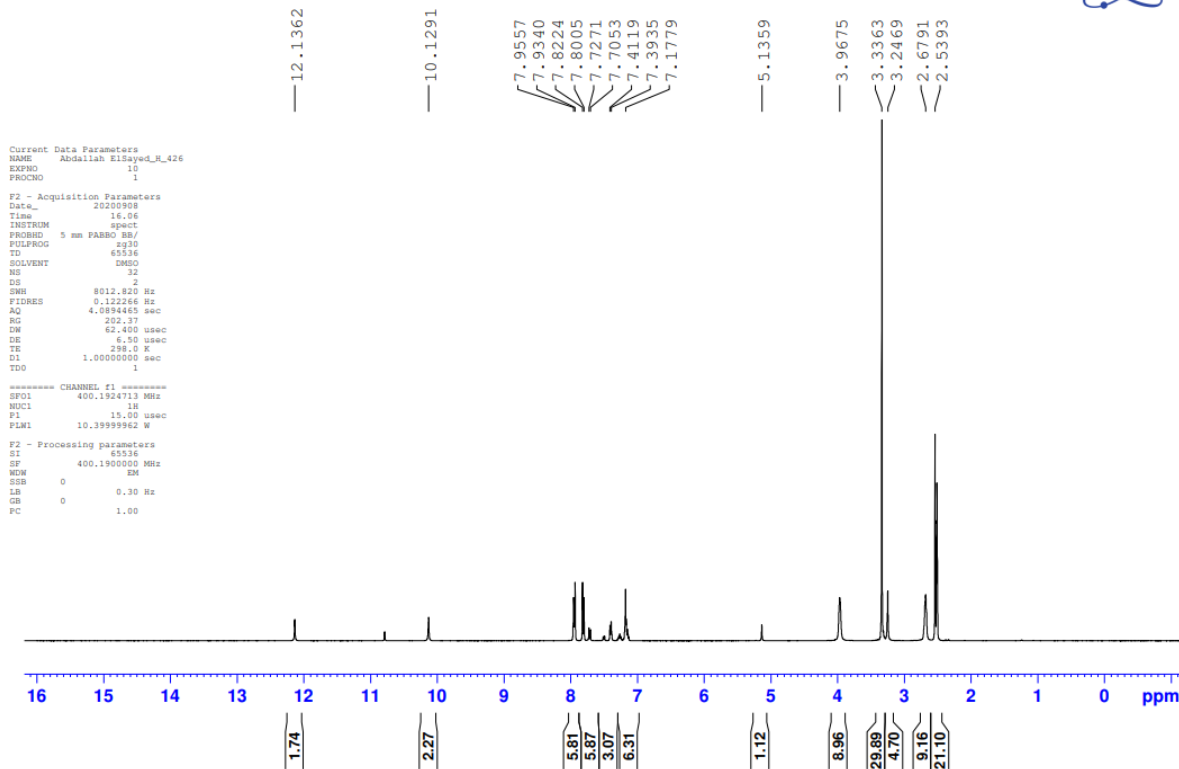

Figure S 33: <sup>1</sup>H NMR chart of compound **13f**

Abdallah ElSayed\_C\_426

Microanalytical Unit - FOPCU - NMR laboratory  
www.pharma.cu.edu.eg dir-mau.fopcu@pharma.cu.edu.eg

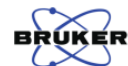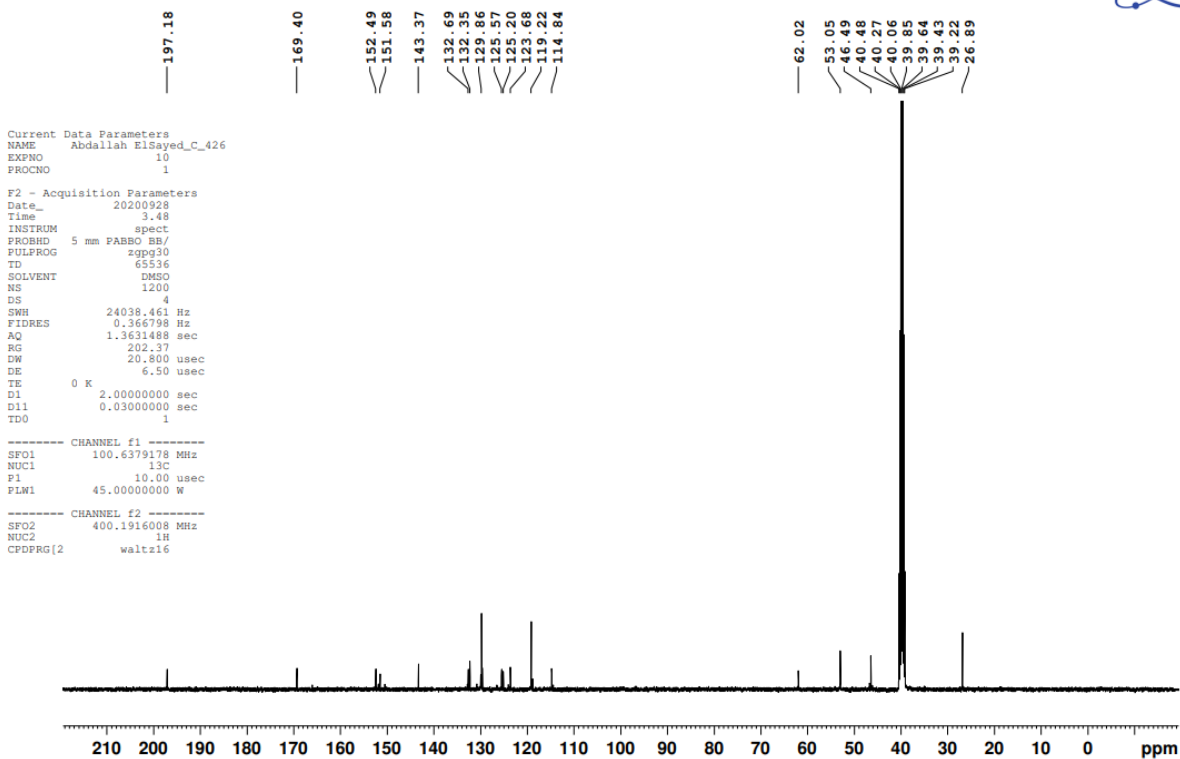

Figure S 34:  $^{13}\text{C}$ NMR chart of compound  $13_f$



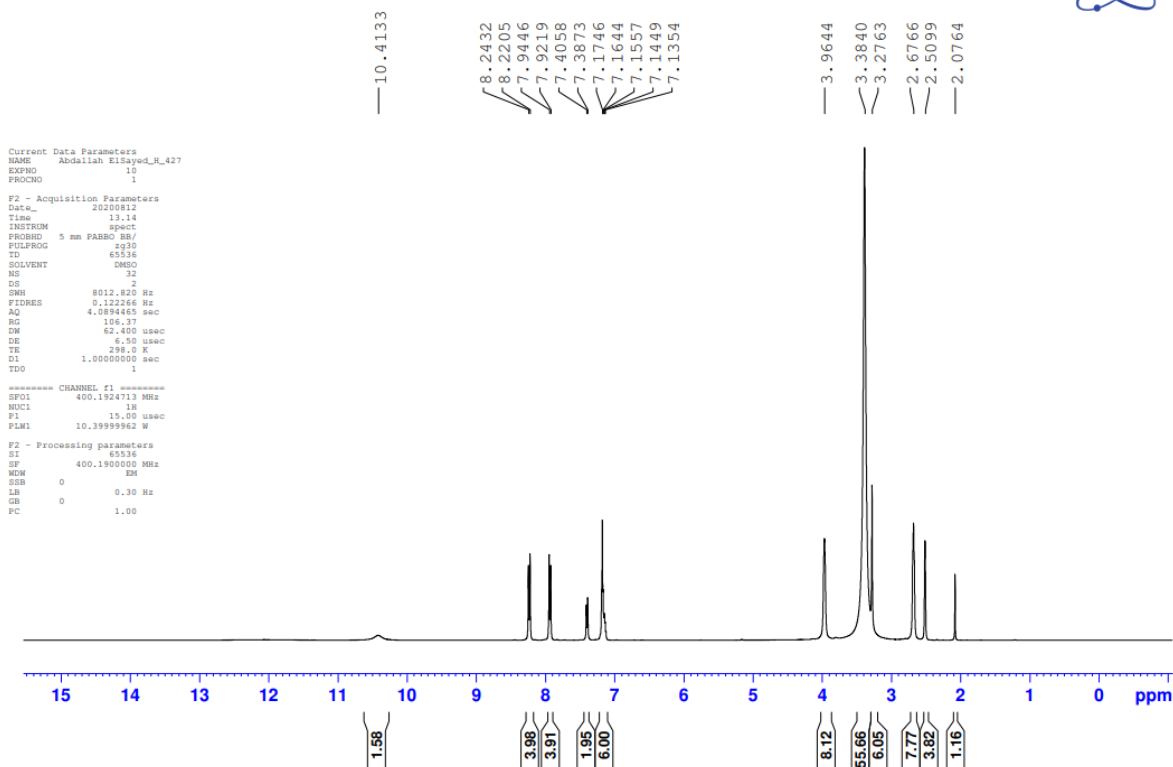Figure S 35:  $^1\text{H}$ NMR chart of compound **13<sub>g</sub>**

Abdallah ElSayed\_C\_427

Microanalytical Unit - FOPCU - NMR laboratory  
www.pharma.cu.edu.eg dir-mau.fopcu@pharma.cu.edu.eg

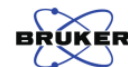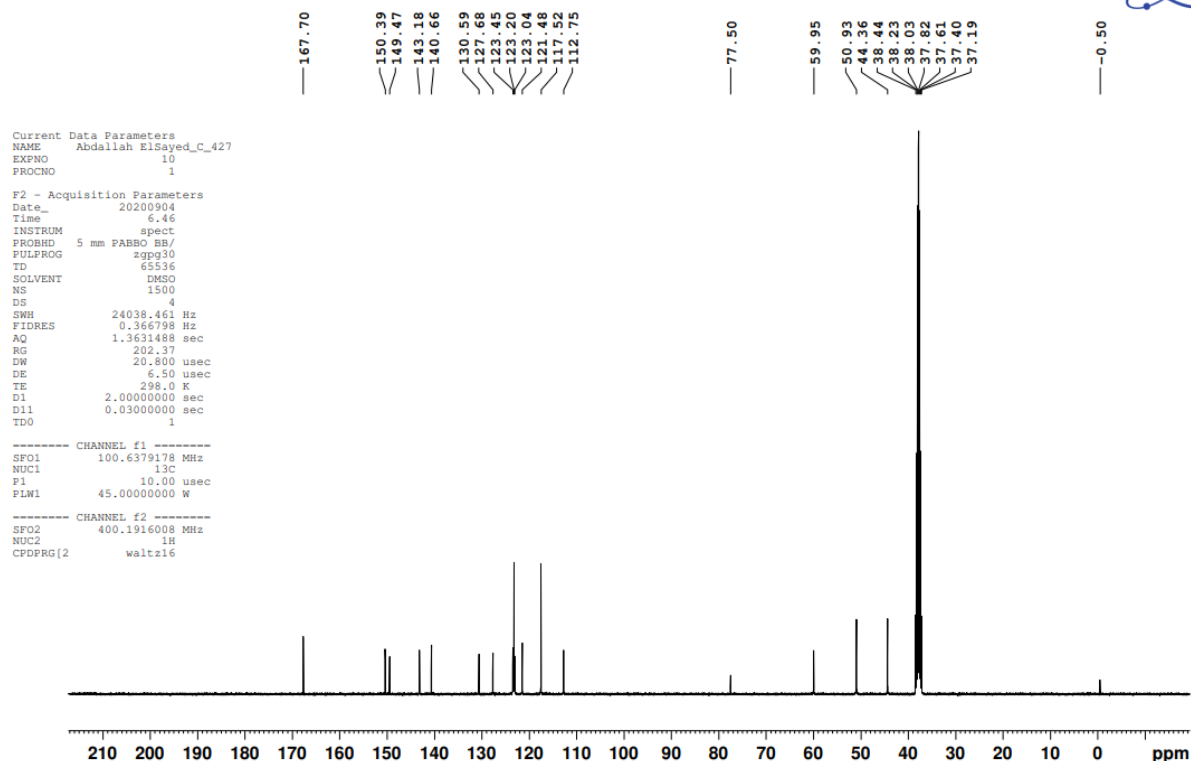

Figure S 36:  $^{13}\text{C}$ NMR chart of compound **13<sub>g</sub>**

Abdallah ElSayed\_H\_429

Microanalytical Unit - FOPCU - NMR laboratory  
www.pharma.cu.edu.eg dir-mau.fopcu@pharma.cu.edu.eg

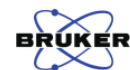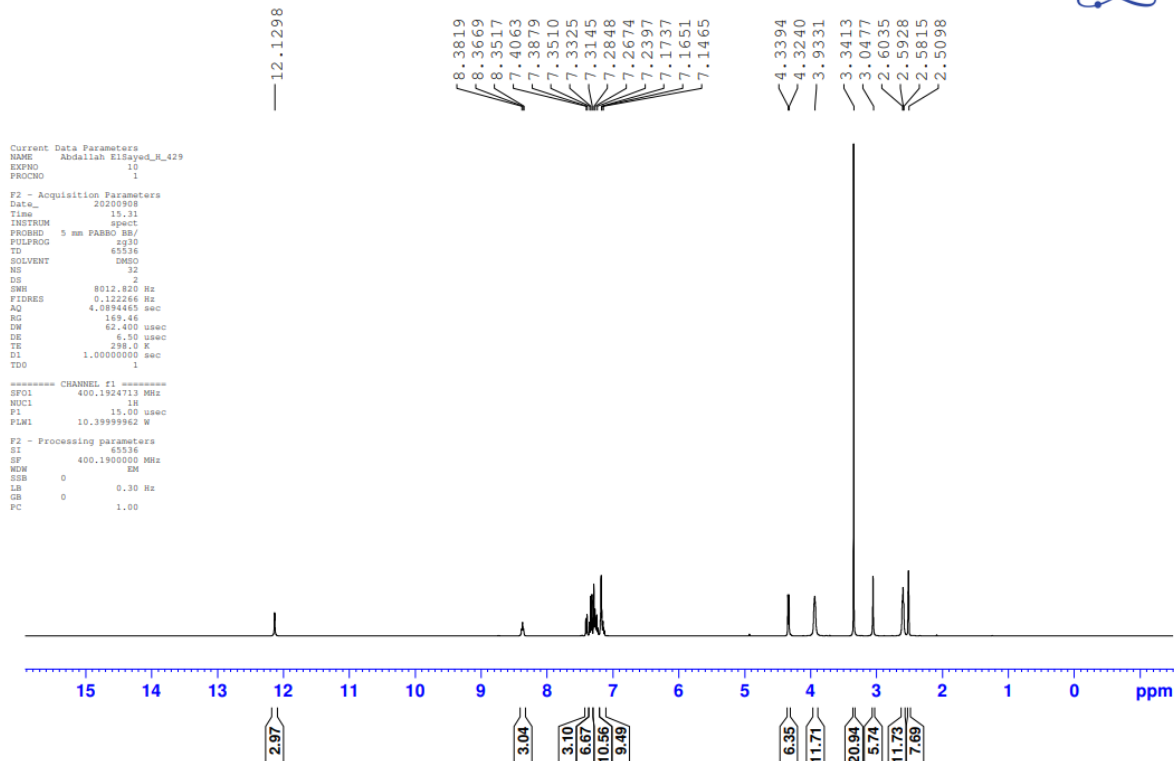

Figure S 37: <sup>1</sup>HNMR chart of compound 14

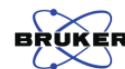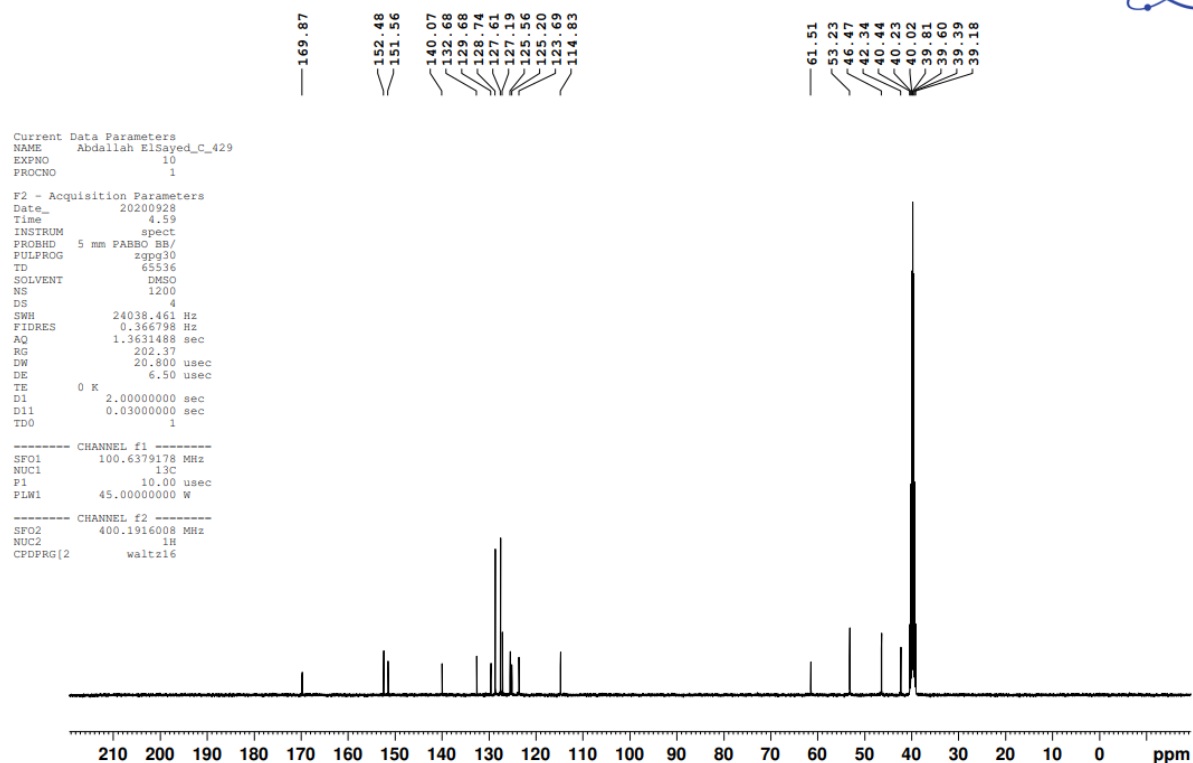Figure S 38:  $^{13}\text{C}$ NMR chart of compound 14
